# Supplementary material for: Direct hydroxyethylation of amines by carbohydrates via ruthenium catalysis
Source: Royal Society of Chemistry journal article supplement (doi:10.1039/c9gc01195a), 2019-01-01

## Supporting Information

### **Direct hydroxyethylation of amines from carbohydrates *via* ruthenium catalysis**

Le Jia,<sup>ab</sup> Mohamed Makha,<sup>b</sup> Chen-Xia Du,<sup>c</sup> Zheng-Jun Quan,<sup>a</sup> Xi-Cun Wang,<sup>\*a</sup> and Yuehui Li,<sup>\*b</sup>

#### **Table of Contents**

|                                                         |     |
|---------------------------------------------------------|-----|
| 1. General experiment details and materials.....        | S2  |
| 2. Optimization of the reaction conditions.....         | S2  |
| 3. Cellulose pre-treatment experiment.....              | S3  |
| 4. Experimental characterization data for products..... | S5  |
| 5. Spectral data.....                                   | S11 |

## 1. General experiment details and materials

Reactions which required the use of anhydrous, inert atmosphere techniques were carried out under an atmosphere of nitrogen. All reactions were carried out in glovebox. All solvents before use were dried and degassed by standard methods and stored under nitrogen atmosphere. All reactions were monitored by TLC with silica gel-coated plates. NMR spectra were recorded on Bruker 400 MHz spectrometer. The NMR chemical shift values refer to CDCl<sub>3</sub> ( $\delta$  (1H), 7.26 ppm;  $\delta$  (13C), 77.00 ppm). GC-MS data were obtained a Shaimadzu GCMS-QP2010 SE, GC data were obtained Shaimadzu GC-2010 Plus, HRMS data were obtained on Agilent 6530 spectrometer at Suzhou Research Institute of LICP.

## 2. Optimization of the reaction conditions

Take the reaction of N-methylaniline and D-(+)-xylose as an example: Ru(cod)(2-methylallyl)<sub>2</sub> (3.3 mg, 0.01 mmol), Xantphos (5.8 mg, 0.01mmol) and the anhydrous 1,4-dioxane (0.5 mL) was mixed in 15 mL pressure-resistant tube containing magneons. Then the mixture was allowed to stir under a nitrogen atmosphere in the pressure-resistant tube at room temperature for 10 minutes, the catalyst solution is prepared. To pressure-resistant tube containing prefabricated catalyst solution was added the representative N-Methylaniline (53.6 mg, 0.5 mmol), the representative D-(+)-xylose (225.0 mg, 1.5 mmol) and CH<sub>3</sub>COOH (9.0 mg, 0.15 mmol) followed by the anhydrous 1,4-dioxane (1.5 mL). The reaction mixture was allowed to stir under a nitrogen atmosphere in the closed pressure-resistant tube heated to 150 °C for 16 h. After the reaction finished, the reaction tube was cooled to room temperature and the pressure was carefully released. The yield were measured by GC using n-dodecane as the internal standard, respectively. The crude reaction mixture was concentrated in vacuo and purified by column chromatography [petroleum ether /ethyl acetate = 5:1] to give the corresponding  $\beta$ -amino alcohols in good yields.

**Table S1.** Optimization of the reaction conditions<sup>a</sup>

Reaction scheme: N-methylaniline (1a) + D-(+)-xylose (2a)  $\xrightarrow[\text{Acid, Solvent, Temperature, 16 h}]{[\text{Ru}] \text{ Catalyst, Ligand}}$  N-methyl-2-phenylethanol (3a)

| Entry | Catalyst (mmol)                       | Ligand (mmol) | Acid (mmol)          | Solvent (mL) | Temperature (°C) | Time (h) | Yield <sup>b</sup> (%) |
|-------|---------------------------------------|---------------|----------------------|--------------|------------------|----------|------------------------|
| 1     | -                                     | -             | CH <sub>3</sub> COOH | 1,4-dioxane  | 150              | 16       | n.d.                   |
| 2     | -                                     | Xantphos      | CH <sub>3</sub> COOH | 1,4-dioxane  | 150              | 16       | n.d.                   |
| 3     | Ru(cod)(2-methylallyl) <sub>2</sub>   | -             | CH <sub>3</sub> COOH | 1,4-dioxane  | 150              | 16       | 24                     |
| 4     | Ru(cod)(2-methylallyl) <sub>2</sub>   | Xantphos      | -                    | 1,4-dioxane  | 150              | 16       | 29                     |
| 5     | (CH <sub>3</sub> COO) <sub>2</sub> Cu | -             | CH <sub>3</sub> COOH | 1,4-dioxane  | 150              | 16       | n.d.                   |
| 6     | NiCl <sub>2</sub> (dppp)              | -             | CH <sub>3</sub> COOH | 1,4-dioxane  | 150              | 16       | n.d.                   |
| 7     | CoCl <sub>2</sub>                     | dppm          | CH <sub>3</sub> COOH | 1,4-dioxane  | 150              | 16       | n.d.                   |
| 8     | Fe(acac) <sub>3</sub>                 | -             | CH <sub>3</sub> COOH | 1,4-dioxane  | 150              | 16       | n.d.                   |
| 9     | Ru(cod)(2-methylallyl) <sub>2</sub>   | Xantphos      | CH <sub>3</sub> COOH | 1,4-dioxane  | 150              | 16       | <b>87</b>              |

|                 |                                                 |                    |                               |                        |     |    |       |
|-----------------|-------------------------------------------------|--------------------|-------------------------------|------------------------|-----|----|-------|
| 10              | $\text{Ru}_3(\text{CO})_{12}$                   | Xantphos           | $\text{CH}_3\text{COOH}$      | 1,4-dioxane            | 150 | 16 | 60    |
| 11              | $\text{RuCl}_2(\text{PPh}_3)_3$                 | Xantphos           | $\text{CH}_3\text{COOH}$      | 1,4-dioxane            | 150 | 16 | 37    |
| 12              | $\text{Ru}(\text{acca})_3$                      | Xantphos           | $\text{CH}_3\text{COOH}$      | 1,4-dioxane            | 150 | 16 | 56    |
| 13              | $[\text{Ru}(\text{p-cymene})\text{Cl}]_2$       | Xantphos           | $\text{CH}_3\text{COOH}$      | 1,4-dioxane            | 150 | 16 | n.d.  |
| 14              | $\text{Ru}(\text{cod})(2\text{-methylallyl})_2$ | DPPF               | $\text{CH}_3\text{COOH}$      | 1,4-dioxane            | 150 | 16 | 9     |
| 15              | $\text{Ru}(\text{cod})(2\text{-methylallyl})_2$ | DPPM               | $\text{CH}_3\text{COOH}$      | 1,4-dioxane            | 150 | 16 | 16    |
| 16              | $\text{Ru}(\text{cod})(2\text{-methylallyl})_2$ | DPPE               | $\text{CH}_3\text{COOH}$      | 1,4-dioxane            | 150 | 16 | 23    |
| 17              | $\text{Ru}(\text{cod})(2\text{-methylallyl})_2$ | DPPP               | $\text{CH}_3\text{COOH}$      | 1,4-dioxane            | 150 | 16 | 18    |
| 18              | $\text{Ru}(\text{cod})(2\text{-methylallyl})_2$ | DPPPen             | $\text{CH}_3\text{COOH}$      | 1,4-dioxane            | 150 | 16 | 23    |
| 19              | $\text{Ru}(\text{cod})(2\text{-methylallyl})_2$ | DPEPhos            | $\text{CH}_3\text{COOH}$      | 1,4-dioxane            | 150 | 16 | 9     |
| 20              | $\text{Ru}(\text{cod})(2\text{-methylallyl})_2$ | Trianisylphosphine | $\text{CH}_3\text{COOH}$      | 1,4-dioxane            | 150 | 16 | 23    |
| 21              | $\text{Ru}(\text{cod})(2\text{-methylallyl})_2$ | DCyPe              | $\text{CH}_3\text{COOH}$      | 1,4-dioxane            | 150 | 16 | 16    |
| 22              | $\text{Ru}(\text{cod})(2\text{-methylallyl})_2$ | Xantphos           | $\text{CF}_3\text{COOH}$      | 1,4-dioxane            | 150 | 16 | n.d.  |
| 23              | $\text{Ru}(\text{cod})(2\text{-methylallyl})_2$ | Xantphos           | $\text{HCOOH}$                | 1,4-dioxane            | 150 | 16 | 24    |
| 24              | $\text{Ru}(\text{cod})(2\text{-methylallyl})_2$ | Xantphos           | $\text{H}_3\text{PO}_4$       | 1,4-dioxane            | 150 | 16 | n.d.  |
| 25              | $\text{Ru}(\text{cod})(2\text{-methylallyl})_2$ | Xantphos           | $\text{H}_2\text{SO}_4$       | 1,4-dioxane            | 150 | 16 | n.d.  |
| 26              | $\text{Ru}(\text{cod})(2\text{-methylallyl})_2$ | Xantphos           | $(\text{CH}_3)_3\text{CCOOH}$ | 1,4-dioxane            | 150 | 16 | 15    |
| 27              | $\text{Ru}(\text{cod})(2\text{-methylallyl})_2$ | Xantphos           | $\text{CH}_3\text{COOH}$      | Toluene                | 150 | 16 | trace |
| 28              | $\text{Ru}(\text{cod})(2\text{-methylallyl})_2$ | Xantphos           | $\text{CH}_3\text{COOH}$      | DMF                    | 150 | 16 | trace |
| 29              | $\text{Ru}(\text{cod})(2\text{-methylallyl})_2$ | Xantphos           | $\text{CH}_3\text{COOH}$      | $\text{CH}_3\text{CN}$ | 150 | 16 | trace |
| 30              | $\text{Ru}(\text{cod})(2\text{-methylallyl})_2$ | Xantphos           | $\text{CH}_3\text{COOH}$      | Mesitylene             | 150 | 16 | trace |
| 31              | $\text{Ru}(\text{cod})(2\text{-methylallyl})_2$ | Xantphos           | $\text{CH}_3\text{COOH}$      | 1,4-dioxane            | 130 | 16 | 61    |
| 32              | $\text{Ru}(\text{cod})(2\text{-methylallyl})_2$ | Xantphos           | $\text{CH}_3\text{COOH}$      | 1,4-dioxane            | 170 | 16 | 78    |
| 33              | $\text{Ru}(\text{cod})(2\text{-methylallyl})_2$ | Xantphos           | $\text{CH}_3\text{COOH}$      | 1,4-dioxane            | 150 | 8  | 60    |
| 34              | $\text{Ru}(\text{cod})(2\text{-methylallyl})_2$ | Xantphos           | $\text{CH}_3\text{COOH}$      | 1,4-dioxane            | 150 | 24 | 81    |
| 35 <sup>c</sup> | $\text{Ru}(\text{cod})(2\text{-methylallyl})_2$ | Xantphos           | $\text{CH}_3\text{COOH}$      | 1,4-dioxane            | 150 | 16 | 74    |
| 36 <sup>d</sup> | $\text{Ru}(\text{cod})(2\text{-methylallyl})_2$ | Xantphos           | $\text{CH}_3\text{COOH}$      | 1,4-dioxane            | 150 | 16 | 83    |
| 37 <sup>e</sup> | $\text{Ru}(\text{cod})(2\text{-methylallyl})_2$ | Xantphos           | $\text{CH}_3\text{COOH}$      | 1,4-dioxane            | 150 | 16 | 63    |

<sup>a</sup> General conditions: **1a** (0.5 mmol), D-(+)-xylose (1.5 mmol), catalyst (0.01 mmol), ligand (0.01 mmol), acid (0.15 mmol), solvent (2.0 mL), at 150 °C in the nitrogen atmosphere for 16h. <sup>b</sup> Yields were determined by GC analysis using n-docecane as the internal standard. <sup>c</sup> 1.0 mol%  $\text{Ru}(\text{cod})(2\text{-methylallyl})_2$ , 1.0 mol% Xantphos; <sup>d</sup> 3.0 mol%  $\text{Ru}(\text{cod})(2\text{-methylallyl})_2$ , 6.0 mol% Xantphos; <sup>e</sup> 1 mL 1,4-dioxane.

### 3. Cellulose pre-treatment experiment

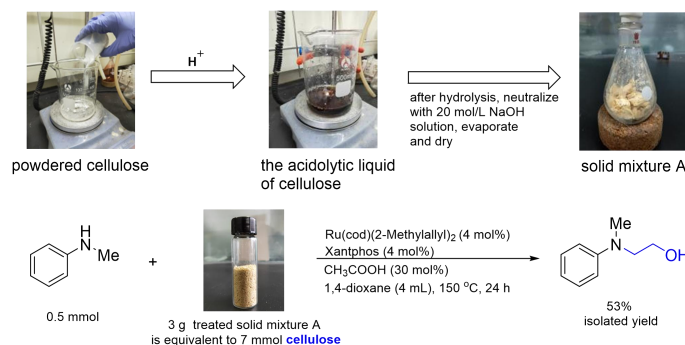

10 g of  $\alpha$ -cellulose (particle size about 25  $\mu\text{m}$ ) was stirred with 60 g of a 7:3 mixture of

phosphoric acid (originally 85%) and sulfuric acid (95-98%) at room temperature. The mixture was allowed to stir for 15 hours to effect de-polymerization and partial degradation of cellulose. This is followed by hydrolysis with 100 g water at 80 °C for 2 hours. Upon cooling to room temperature, the solution was neutralized with 20 M NaOH solution to pH = 7. Due to the difference of solubility of inorganic salts ( $\text{Na}_2\text{SO}_4$  and  $\text{Na}_3\text{PO}_4$ ) and degradation products of cellulose, recrystallization was attempted to remove large amounts of inorganic salts ( $\text{Na}_2\text{SO}_4$  and  $\text{Na}_3\text{PO}_4$ ). Cooling the neutralized solution in an ice water bath resulted in precipitation of large amount of white crystalline solid of  $\text{Na}_2\text{SO}_4$  and  $\text{Na}_3\text{PO}_4$ , and removed by filtration. Recrystallization is continued to remove the inorganics by adding small amount of water to the filtrate, cooling in an ice bath and filtering to remove precipitates. Finally, the filtrate was evaporated to dryness to obtain 24 g of solid mixture A. This mixture was used as obtained to convert N-methylaniline to N-(2-Hydroxyethyl)-N-methylaniline in 53% isolated yield (reaction loading was based on the calculated cellulose content in the solid mixture A of 42%).

#### 4. Experimental characterization data for products

##### 2-(methyl(phenyl)amino)ethan-1-ol (3a)

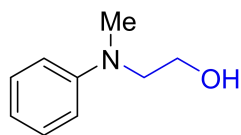

**Yield:** 78% (59 mg), light yellow oil. **<sup>1</sup>H NMR** (400 MHz, CDCl<sub>3</sub>): δ (ppm) 7.24 (t, *J* = 7.2 Hz, 2H), 6.81-6.73 (m, 3H), 3.80 (t, *J* = 4.8 Hz, 2H), 3.46 (t, *J* = 4.8 Hz, 2H), 2.95 (s, 3H), 1.87 (br, 1H). **<sup>13</sup>C NMR** (100 MHz, CDCl<sub>3</sub>): δ (ppm) 150.1, 129.2 (2C), 117.2, 113.0 (2C), 60.0, 55.4, 38.7.

Spectroscopic data are consistent with those previously reported: *Org. Lett.* **2017**, *19*, 1490-1493.

##### 2-(methyl(p-tolyl)amino)ethan-1-ol (3b)

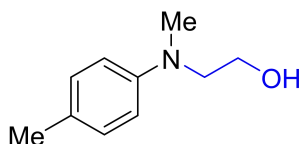

**Yield:** 75% (62 mg), yellow oil. **<sup>1</sup>H NMR** (400 MHz, CDCl<sub>3</sub>): δ (ppm) 7.07 (d, *J* = 7.5 Hz, 2H), 6.76 (d, *J* = 7.5 Hz, 2H), 3.79 (t, *J* = 5.6 Hz, 2H), 3.42 (t, *J* = 5.6 Hz, 2H), 2.92 (s, 3H), 2.27 (s, 3H), 2.05 (br, 1H). **<sup>13</sup>C NMR** (100 MHz, CDCl<sub>3</sub>): δ (ppm) 148.2, 129.7 (2C), 126.8, 113.7 (2C), 59.9, 56.0, 38.8, 20.2.

Spectroscopic data are consistent with those previously reported: *Arch Pharm Res*, **2007**, *30*, 1055-1061.

##### 2-(methyl(m-tolyl)amino)ethan-1-ol (3c)

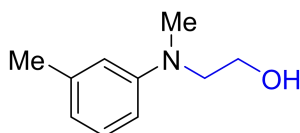

**Yield:** 71% (58 mg), yellow oil. **<sup>1</sup>H NMR** (400 MHz, CDCl<sub>3</sub>): δ (ppm) 7.15 (t, *J* = 7.3 Hz, 1H), 6.65-6.59 (m, 3H), 3.81 (t, *J* = 5.5 Hz, 2H), 3.46 (t, *J* = 5.5 Hz, 2H), 2.95 (s, 3H), 2.33 (s, 3H), 1.88 (br, 1H). **<sup>13</sup>C NMR** (100 MHz, CDCl<sub>3</sub>): δ (ppm) 150.2, 138.9, 129.0, 118.2, 113.9, 110.3, 60.0, 55.5, 38.7, 21.9. **HRMS**(ESI) calcd for C<sub>10</sub>H<sub>15</sub>NOH<sup>+</sup>: 166.1226. Found: 166.1225 (MH<sup>+</sup>).

##### 2-(methyl(o-tolyl)amino)ethan-1-ol (3d)

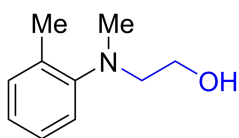

**Yield:** 58% (48 mg), dark green oil. **<sup>1</sup>H NMR** (400 MHz, CDCl<sub>3</sub>): δ (ppm) 7.19 (t, *J* = 7.3 Hz, 2H), 7.11 (d, *J* = 8.2 Hz, 1H), 7.03 (t, *J* = 7.4 Hz, 1H), 3.69 (t, *J* = 4.5 Hz, 2H), 3.10 (t, *J* = 5.0 Hz, 2H), 2.66 (s, 3H), 2.34 (s, 3H). **<sup>13</sup>C NMR** (100 MHz, CDCl<sub>3</sub>): δ (ppm) 151.6, 133.5, 131.2, 126.7, 124.0, 120.8, 58.8, 57.5, 42.1, 18.2. **HRMS**(ESI) calcd for C<sub>10</sub>H<sub>15</sub>NOH<sup>+</sup>: 166.1226. Found: 166.1224 (MH<sup>+</sup>).

##### 2-((4-fluorophenyl)(methyl)amino)ethan-1-ol (3e)

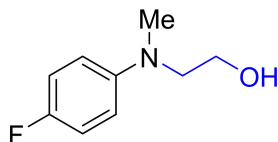

**Yield:** 69% (58 mg), brown yellow oil. **<sup>1</sup>H NMR** (400 MHz, CDCl<sub>3</sub>): δ (ppm) 6.94 (t, *J* = 8.4 Hz, 2H), 6.77-6.74 (m, 2H), 3.78 (t, *J* = 5.6 Hz, 2H), 3.38 (t, *J* = 5.6 Hz, 2H), 2.89 (s, 3H), 2.12 (br, 1H). **<sup>13</sup>C NMR** (100 MHz, CDCl<sub>3</sub>): δ (ppm) 157.0, 154.7, 147.0, 115.6, 115.4, 114.8, 114.7, 59.8, 56.4, 39.1. **HRMS**(ESI) calcd for C<sub>9</sub>H<sub>12</sub>FNOH<sup>+</sup>: 170.0976. Found: 170.0975 (MH<sup>+</sup>).

##### 2-((4-chlorophenyl)(methyl)amino)ethan-1-ol (3f)

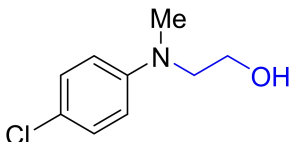

**Yield:** 75% (69 mg), a White solid. **<sup>1</sup>H NMR** (400 MHz, CDCl<sub>3</sub>): δ (ppm) 7.17-7.14 (m, 2H), 6.70-6.67 (m, 2H), 3.78 (t, *J* = 5.6 Hz, 2H),

3.43 (t,  $J$  = 5.6 Hz, 2H), 2.93 (s, 3H), 1.92 (br, 1H).  $^{13}\text{C}$  NMR (100 MHz,  $\text{CDCl}_3$ ):  $\delta$  (ppm) 148.6, 128.9 (2C), 121.9, 114.0 (2C), 60.0, 55.4, 38.8.

Spectroscopic data are consistent with those previously reported: *Chem. Eur. J.*, **2014**, *20*, 14063-14073.

### 2-((3-chlorophenyl)(methyl)amino)ethan-1-ol (3g)

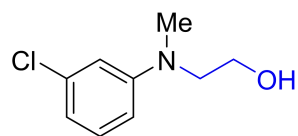

**Yield:** 66% (61 mg), yellow oil.  $^1\text{H}$  NMR (400 MHz,  $\text{CDCl}_3$ ):  $\delta$  (ppm) 7.12 (t,  $J$  = 8.1 Hz, 1H), 6.72-6.62 (m, 3H), 3.78 (t,  $J$  = 4.8 Hz, 2H), 3.45 (t,  $J$  = 5.3 Hz, 2H), 2.95 (s, 3H), 2.00 (br, 1H).  $^{13}\text{C}$  NMR (100 MHz,  $\text{CDCl}_3$ ):  $\delta$  (ppm) 150.8, 135.0, 130.0, 116.6, 112.4, 110.7, 60.0, 54.9, 38.7. **HRMS**(ESI) calcd for  $\text{C}_9\text{H}_{12}\text{ClNOH}^+$ : 186.0680. Found: 186.0680 ( $\text{MH}^+$ ).

### 2-((4-bromophenyl)(methyl)amino)ethan-1-ol (3h)

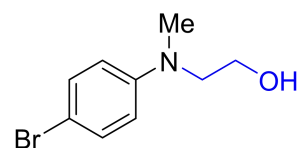

**Yield:** 57% (65 mg), yellow oil.  $^1\text{H}$  NMR (400 MHz,  $\text{CDCl}_3$ ):  $\delta$  (ppm) 7.29 (d,  $J$  = 9.1 Hz, 2H), 6.65 (d,  $J$  = 9.0 Hz, 2H), 3.79 (t,  $J$  = 5.6 Hz, 2H), 3.44 (t,  $J$  = 5.6 Hz, 2H), 2.93 (s, 3H), 1.87 (br, 1H).  $^{13}\text{C}$  NMR (100 MHz,  $\text{CDCl}_3$ ):  $\delta$  (ppm) 148.9, 131.8 (2C), 114.4 (2C), 108.9, 60.0, 55.3, 38.8. **HRMS**(ESI) calcd for  $\text{C}_9\text{H}_{12}\text{BrNOH}^+$ : 230.0175. Found: 230.0174 ( $\text{MH}^+$ ).

### 2-(methyl(4-(trifluoromethyl)phenyl)amino)ethan-1-ol (3i)

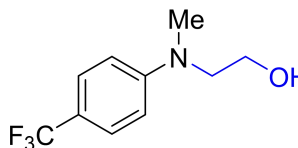

**Yield:** 43% (47 mg), yellow oil.  $^1\text{H}$  NMR (400 MHz,  $\text{CDCl}_3$ ):  $\delta$  (ppm) 7.45 (d,  $J$  = 8.6 Hz, 2H), 6.76 (d,  $J$  = 8.6 Hz, 2H), 3.83 (t,  $J$  = 5.6 Hz, 2H), 3.54 (t,  $J$  = 5.6 Hz, 2H), 3.04 (s, 3H), 1.78 (br, 1H).  $^{13}\text{C}$  NMR (100 MHz,  $\text{CDCl}_3$ ):  $\delta$  (ppm) 151.7, 126.5, 126.4, 118.2, 117.8, 111.4, 60.1, 54.6, 38.9.

Spectroscopic data are consistent with those previously reported: *J. Am. Chem. Soc.*, **1998**, *120*, 10676-10686.

### 1-(4-((2-hydroxyethyl)(methyl)amino)phenyl)ethan-1-one (3j)

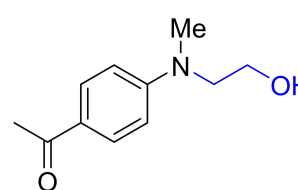

**Yield:** 58% (56 mg), yellow solid.  $^1\text{H}$  NMR (400 MHz,  $\text{CDCl}_3$ ):  $\delta$  (ppm) 7.81 (d,  $J$  = 9.1 Hz, 2H), 6.67 (d,  $J$  = 9.0 Hz, 2H), 3.83 (t,  $J$  = 5.8 Hz, 2H), 3.58 (t,  $J$  = 5.8 Hz, 2H), 3.07 (s, 3H), 2.47 (s, 3H).  $^{13}\text{C}$  NMR (100 MHz,  $\text{CDCl}_3$ ):  $\delta$  (ppm) 196.6, 152.9, 130.6 (2C), 125.4, 110.7 (2C), 60.0, 54.3, 39.0, 26.0.

Spectroscopic data are consistent with those previously reported: *Bull. Korean Chem. Soc.* **2002**, *23*, 964-970.

### 4-((2-hydroxyethyl)(methyl)amino)benzoic acid (3k)

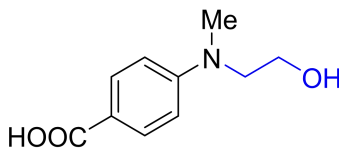

**Yield:** 53% (52 mg), yellow solid.  $^1\text{H}$  NMR (400 MHz,  $d_6$ -DMSO):  $\delta$  (ppm) 12.11 (br, 1H), 7.75 (d,  $J$  = 8.1 Hz, 2H), 6.72 (d,  $J$  = 8.2 Hz, 2H), 4.77 (br, 1H), 3.62-3.54 (m, 2H), 3.54-3.45 (m, 2H), 3.02 (s, 3H).  $^{13}\text{C}$  NMR (100 MHz,  $d_6$ -DMSO):  $\delta$  (ppm)

168.0, 152.7, 131.4, 116.9, 110.9, 58.5, 54.3, 39.2. **HRMS**(ESI) calcd for  $C_{10}H_{13}NO_3H^+$ : 196.0968. Found: 196.0967 ( $MH^+$ ).

**methyl 4-((2-hydroxyethyl)(methyl)amino)benzoate (3l)**

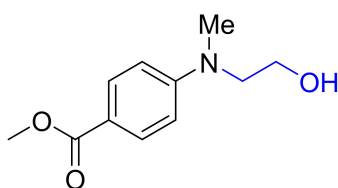

**Yield:** 67% (70 mg), pale yellow solid.  **$^1H$  NMR** (400 MHz,  $CDCl_3$ ):  $\delta$  (ppm) 7.83 (d,  $J$  = 8.6 Hz, 2H), 6.63 (d,  $J$  = 8.6 Hz, 2H), 3.81 (s, 3H), 3.78 (t, 5.6 Hz, 2H), 3.52 (t,  $J$  = 5.4 Hz, 2H), 3.02 (s, 3H), 2.79 (br, 1H).  **$^{13}C$  NMR** (100 MHz,  $CDCl_3$ ):  $\delta$  (ppm) 167.6, 152.6, 131.2, 116.7, 110.6, 59.7, 54.2, 51.5, 38.9. **HRMS**(ESI) calcd for  $C_{11}H_{15}NO_3H^+$ : 210.1125. Found: 210.1126 ( $MH^+$ ).

**2-(ethyl(phenyl)amino)ethan-1-ol (3n)**

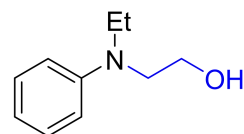

**Yield:** 74% (61 mg), yellow oil.  **$^1H$  NMR** (400 MHz,  $CDCl_3$ ):  $\delta$  (ppm) 7.28 (td,  $J$  = 8.0, 0.6 Hz, 2H), 6.84-6.75 (m, 3H), 3.83 (t,  $J$  = 5.8 Hz, 2H), 3.52-3.43 (m, 4H), 1.94 (br, 1H), 1.20 (t,  $J$  = 7.0 Hz, 3H).  **$^{13}C$  NMR** (100 MHz,  $CDCl_3$ ):  $\delta$  (ppm) 148.3, 129.3 (2C), 116.8, 113.0 (2C), 60.1, 52.6,

45.7, 11.8.

Spectroscopic data are consistent with those previously reported: *J. Am. Chem. Soc.* **2015**, 137, 13580-13587.

**2-(isopropyl(phenyl)amino)ethan-1-ol (3o)**

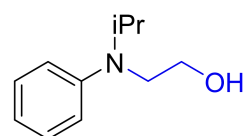

**Yield:** 65% (58 mg), a yellow oil.  **$^1H$  NMR** (400 MHz,  $CDCl_3$ ):  $\delta$  (ppm) 7.25-7.21 (m, 2H), 6.89 (d,  $J$  = 8.0 Hz, 2H), 6.79 (t,  $J$  = 7.3 Hz, 1H), 4.01-3.91 (m, 1H), 3.67 (t,  $J$  = 6.2 Hz, 2H), 3.30 (t,  $J$  = 6.2 Hz, 2H), 2.00 (br, 1H), 1.16 (d,  $J$  = 6.6 Hz, 6H).  **$^{13}C$  NMR** (100 MHz,  $CDCl_3$ ):  $\delta$  (ppm)

148.8, 129.1 (2C), 118.4, 116.2 (2C), 60.1, 50.6, 45.8, 19.9 (2C). **HRMS**(ESI) calcd for  $C_{11}H_{17}NOH^+$ : 180.1383. Found: 180.1382 ( $MH^+$ ).

**2-(butyl(phenyl)amino)ethan-1-ol (3p)**

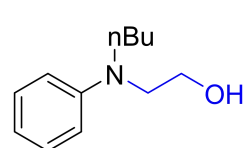

**Yield:** 67% (65 mg), yellow oil.  **$^1H$  NMR** (400 MHz,  $CDCl_3$ ):  $\delta$  (ppm) 7.22 (t,  $J$  = 7.7 Hz, 2H), 6.76-6.69 (m, 3H), 3.76 (t,  $J$  = 5.8 Hz, 2H), 3.46 (t,  $J$  = 5.8 Hz, 2H), 3.31 (t,  $J$  = 7.6 Hz, 2H), 1.96 (br, 1H), 1.60-1.52 (m, 2H), 1.39-1.30 (m, 2H), 0.95 (t,  $J$  = 7.3 Hz, 3H).  **$^{13}C$  NMR** (100 MHz,  $CDCl_3$ ):

$\delta$  (ppm) 148.3, 129.2 (2C), 116.5, 112.7 (2C), 60.0, 53.1, 51.5, 28.8, 20.2, 14.0. **HRMS**(ESI) calcd for  $C_{12}H_{19}NOH^+$ : 194.1539. Found: 194.1539 ( $MH^+$ ).

**2-(dodecyl(phenyl)amino)ethan-1-ol (3q)**

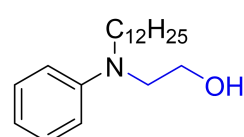

**Yield:** 61% (93 mg), yellow oil.  **$^1H$  NMR** (400 MHz,  $CDCl_3$ ):  $\delta$  (ppm) 7.23 (t,  $J$  = 7.9 Hz, 2H), 6.75 (d,  $J$  = 8.2 Hz, 2H), 6.71 (t,  $J$  = 7.2 Hz, 1H), 3.83-3.76 (m, 2H), 3.48 (t,  $J$  = 5.8 Hz, 2H), 3.32-3.29 (m, 2H), 1.78 (br 1H), 1.60-1.56 (m, 2H), 1.35-1.2 (m, 18H), 0.89 (t,  $J$  = 6.7 Hz, 3H).  **$^{13}C$**

**NMR** (100 MHz,  $CDCl_3$ ):  $\delta$  (ppm) 148.4, 129.3 (2C), 116.6, 112.8 (2C), 60.0, 53.2, 51.8, 31.9, 29.7 (4C), 29.5, 29.4, 27.1, 26.7, 22.7, 14.1. **HRMS**(ESI) calcd for  $C_{20}H_{35}NOH^+$ : 306.2791. Found: 306.2794 ( $MH^+$ ).

### 2-(cyclohexyl(phenyl)amino)ethan-1-ol (3r)

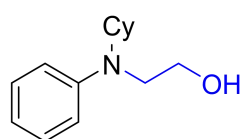

**Yield:** 56% (61 mg), yellow oil. **<sup>1</sup>H NMR** (400 MHz, CDCl<sub>3</sub>): δ (ppm) 7.24 (t, *J* = 7.6 Hz, 2H), 6.88 (d, *J* = 8.4 Hz, 2H), 6.78 (t, *J* = 6.9 Hz, 1H), 3.67 (t, *J* = 5.9 Hz, 2H), 3.49-3.44 (m, 1H), 3.37 (t, *J* = 6.0 Hz, 2H), 1.83 (d, *J* = 9.7 Hz, 5H), 1.67 (d, *J* = 12.5 Hz, 1H), 1.43-1.31 (m, 4H), 1.16-1.07 (m, 1H). **<sup>13</sup>C NMR** (100 MHz, CDCl<sub>3</sub>): δ (ppm) 148.8, 129.1 (2C), 118.2, 115.9 (2C), 60.3, 59.4, 46.9, 30.7, 26.1, 25.8. **HRMS**(ESI) calcd for C<sub>14</sub>H<sub>21</sub>NOH<sup>+</sup>: 220.1696. Found: 220.1697 (MH<sup>+</sup>).

### 2-(benzyl(phenyl)amino)ethan-1-ol (3s)

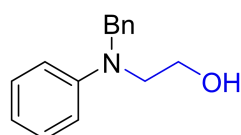

**Yield:** 70% (79 mg), yellow oil. **<sup>1</sup>H NMR** (400 MHz, CDCl<sub>3</sub>): δ (ppm) 7.33-7.18 (m, 7H), 6.78 (d, *J* = 8.4 Hz, 2H), 6.72 (t, *J* = 7.3 Hz, 1H), 4.62 (s, 2H), 3.83 (t, *J* = 5.7 Hz, 2H), 3.61 (t, *J* = 5.7 Hz, 2H), 1.79 (br, 1H). **<sup>13</sup>C NMR** (100 MHz, CDCl<sub>3</sub>): δ (ppm) 148.7, 138.5, 129.3, 128.6, 126.9, 126.5, 117.0, 112.7, 60.2, 55.0, 53.3.

### 2-(diphenylamino)ethan-1-ol (3t)

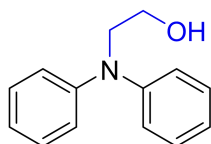

**Yield:** 42% (45 mg), brown oil. **<sup>1</sup>H NMR** (400 MHz, CDCl<sub>3</sub>): δ (ppm) 7.27 (t, *J* = 7.4 Hz, 4H), 7.05 (d, *J* = 8.2 Hz, 4H), 6.97 (t, *J* = 7.4 Hz, 2H), 3.93 (t, *J* = 5.6 Hz, 2H), 3.83 (t, *J* = 5.6 Hz, 2H). **<sup>13</sup>C NMR** (100 MHz, CDCl<sub>3</sub>): δ (ppm) 148.0 (2C), 129.4 (4C), 121.7 (2C), 121.2 (4C), 59.9, 54.2.

Spectroscopic data are consistent with those previously reported: *Medicinal Chemistry Research*, **2005**, *14*, 241-259.

### 2-(methyl(naphthalen-1-yl)amino)ethan-1-ol (3u)

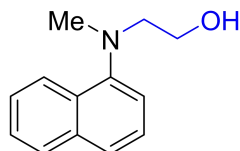

**Yield:** 56% (56 mg), yellow oil. **<sup>1</sup>H NMR** (400 MHz, CDCl<sub>3</sub>): δ (ppm) 8.30 (d, *J* = 8.0 Hz, 1H), 7.85 (d, *J* = 7.8 Hz, 1H), 7.60 (d, *J* = 8.3 Hz, 1H), 7.54-7.47 (m, 2H), 7.42 (t, *J* = 7.8 Hz, 1H), 7.19 (d, *J* = 7.5 Hz, 1H), 3.81 (t, *J* = 5.2 Hz, 2H), 3.32 (t, *J* = 5.4 Hz, 2H), 2.88 (s, 3H), 2.54 (br, 1H). **<sup>13</sup>C NMR** (100 MHz, CDCl<sub>3</sub>): δ (ppm) 149.5, 134.7, 129.4, 128.4, 125.9, 125.7, 125.6, 124.1, 123.2, 116.3, 59.1, 57.8, 43.2. **HRMS**(ESI) calcd for C<sub>13</sub>H<sub>15</sub>NOH<sup>+</sup>; calculated: 202.1226. Found: 202.1227 (MH<sup>+</sup>).

### 2-(indolin-1-yl)ethan-1-ol (3v)

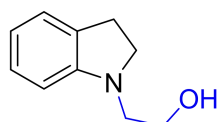

**Yield:** 65% (53 mg), yellow oil. **<sup>1</sup>H NMR** (400 MHz, CDCl<sub>3</sub>): δ (ppm) 7.13-7.08 (m, 2H), 6.72 (d, *J* = 7.3 Hz, 1H), 6.58 (d, *J* = 7.8 Hz, 1H), 3.81 (t, *J* = 5.2 Hz, 2H), 3.39 (t, *J* = 8.3 Hz, 2H), 3.24 (t, *J* = 5.1 Hz, 2H), 3.00 (t, *J* = 8.2 Hz, 2H), 2.25 (br, 1H). **<sup>13</sup>C NMR** (100 MHz, CDCl<sub>3</sub>): δ (ppm) 152.7, 130.0, 127.3, 124.5, 118.3, 107.4, 60.1, 53.9, 52.5, 28.6.

Spectroscopic data are consistent with those previously reported: *Tetrahedron*, **2017**, *73*, 5552-5561

### 2-(3,4-dihydroquinolin-1(2H)-yl)ethan-1-ol (3w)

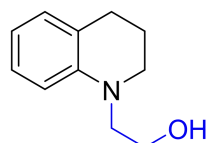

**Yield:** 67% (59 mg), yellow oil. **<sup>1</sup>H NMR** (400 MHz, CDCl<sub>3</sub>): δ (ppm) 7.06 (t,



$J = 7.7$  Hz, 1H), 6.97 (d,  $J = 7.3$  Hz, 1H), 6.69 (d,  $J = 8.3$  Hz, 1H), 6.62 (t,  $J = 7.3$  Hz, 1H), 3.82 (t,  $J = 5.6$  Hz, 2H), 3.45 (t,  $J = 5.6$  Hz, 2H), 3.33 (t,  $J = 5.6$  Hz, 2H), 2.79 (t,  $J = 6.3$  Hz, 2H), 2.00-1.94 (m, 2H), 1.87 (br, 1H).  $^{13}\text{C}$  NMR (100 MHz,  $\text{CDCl}_3$ ):  $\delta$  (ppm) 145.8, 129.3, 127.1, 122.8, 116.4, 111.3, 59.8, 54.1, 50.3, 28.0, 22.2.

Spectroscopic data are consistent with those previously reported: *Tetrahedron*, **2017**, 73, 5552-5561

### 2-(2,3,4,5-tetrahydro-1H-benzo[b]azepin-1-yl)ethan-1-ol (3x)

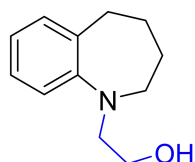

**Yield:** 66% (63 mg), pale yellow oil.  $^1\text{H}$  NMR (400 MHz,  $\text{CDCl}_3$ ):  $\delta$  (ppm) 7.25-7.19 (m, 2H), 7.05-6.98 (m, 2H), 3.75 (t,  $J = 3.8$  Hz, 2H), 3.39 (t,  $J = 3.7$  Hz, 2H), 3.00-2.98 (m, 2H), 2.88-2.86 (m, 2H), 2.66 (br, 1H), 1.87-1.76 (m, 2H), 1.73-1.63 (m, 2H).  $^{13}\text{C}$  NMR (100 MHz,  $\text{CDCl}_3$ ):  $\delta$  (ppm) 151.7, 137.2, 130.0, 126.7, 122.3, 118.3, 59.2, 55.6, 54.2, 35.0, 30.7, 25.8. **HRMS**(ESI) calcd for  $\text{C}_{12}\text{H}_{17}\text{NOH}^+$ : 192.1383. Found: 192.1382 ( $\text{MH}^+$ ).

### 2-(3,4-dihydroquinolin-1(2H)-yl)ethan-1-ol (3y)

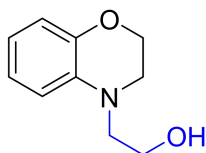

**Yield:** 63% (56 mg), yellow oil.  $^1\text{H}$  NMR (400 MHz,  $\text{CDCl}_3$ ):  $\delta$  (ppm) 6.83 (dd,  $J = 15.6, 7.7$  Hz, 2H), 6.73 (d,  $J = 7.8$  Hz, 1H), 6.66 (t,  $J = 7.3$  Hz, 1H), 4.23 (s, 2H), 3.80 (t,  $J = 5.3$  Hz, 2H), 3.42-3.39 (m, 4H), 2.47 (br, 1H).  $^{13}\text{C}$  NMR (100 MHz,  $\text{CDCl}_3$ ):  $\delta$  (ppm) 144.1, 135.3, 121.5, 117.9, 116.4, 112.6, 64.2, 59.5, 53.7, 47.9. **HRMS**(ESI) calcd for  $\text{C}_{10}\text{H}_{13}\text{NO}_2\text{H}^+$ : 180.1019. Found: 180.1027 ( $\text{MH}^+$ ).

### 1-(2-hydroxyethyl)-1,2,3,4-tetrahydro-5H-benzo[b]azepin-5-one (3z)

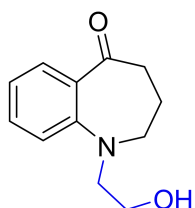

**Yield:** 56% (57 mg), yellow oil.  $^1\text{H}$  NMR (400 MHz,  $\text{CDCl}_3$ ):  $\delta$  (ppm) 7.74 (d,  $J = 7.8$  Hz, 1H), 7.31 (t,  $J = 7.7$  Hz, 1H), 6.99 (d,  $J = 8.5$  Hz, 1H), 6.81 (d,  $J = 7.4$  Hz, 1H), 4.49 (br, 1H), 3.91 (t,  $J = 5.8$  Hz, 2H), 3.69 (t,  $J = 5.8$  Hz, 2H), 3.34 (t,  $J = 6.6$  Hz, 2H), 2.79 (t,  $J = 7.2$  Hz, 2H), 2.33-2.26 (m, 2H).  $^{13}\text{C}$  NMR (100 MHz,  $\text{CDCl}_3$ ):  $\delta$  (ppm) 203.7, 153.3, 132.4, 129.8, 127.2, 118.1, 114.6, 60.1, 55.1, 53.5, 40.92, 31.9. **HRMS**(ESI) calcd for  $\text{C}_{12}\text{H}_{15}\text{NO}_2\text{H}^+$ : 206.1176. Found: 206.1175 ( $\text{MH}^+$ ).

### 2-(2,3-dihydro-4H-benzo[b][1,4]thiazin-4-yl)ethan-1-ol (3aa)

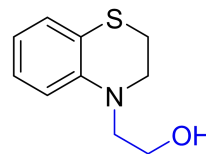

**Yield:** 55% (54 mg), yellow oil.  $^1\text{H}$  NMR (400 MHz,  $\text{CDCl}_3$ ):  $\delta$  (ppm) 7.05 (dd,  $J = 7.7, 1.3$  Hz, 1H), 7.02-6.95 (m, 1H), 6.74 (d,  $J = 8.3$  Hz, 1H), 6.65 (t,  $J = 7.4$  Hz, 1H), 3.79 (t,  $J = 5.7$  Hz, 2H), 3.66-3.60 (m, 2H), 3.45 (t,  $J = 5.7$  Hz, 2H), 3.05-2.98 (m, 2H), 2.30 (br, 1H).  $^{13}\text{C}$  NMR (100 MHz,  $\text{CDCl}_3$ ):  $\delta$  (ppm) 143.5, 128.0, 126.0, 118.3, 117.9, 113.7, 59.5, 55.0, 50.7, 25.5. **HRMS**(ESI) calcd for  $\text{C}_{10}\text{H}_{14}\text{NOSH}^+$ : 196.0791. Found: 196.0801 ( $\text{MH}^+$ ).

### 4-phenylmorpholin-2-one (3ae)

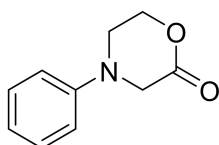

$^1\text{H}$  NMR (400 MHz,  $\text{CDCl}_3$ ):  $\delta$  (ppm) 7.33 (t,  $J = 7.5$  Hz, 2H), 6.92 (t,  $J = 7.1$  Hz, 1H), 6.80 (d,  $J = 7.8$  Hz, 2H), 4.55 (t,  $J = 5.0$  Hz, 2H), 4.11 (s, 2H), 3.48 (t,  $J = 5.0$  Hz, 2H).  $^{13}\text{C}$  NMR (100 MHz,  $\text{CDCl}_3$ ):  $\delta$  (ppm) 167.5,

147.7, 129.4, 119.7, 113.6, 67.4, 49.9, 43.9.

Spectroscopic data are consistent with those previously reported: *J. Am. Chem. Soc.* **2014**, *136*, 9252-9255.

## 5. Spectral data

### 2-(methyl(phenyl)amino)ethan-1-ol (3a)

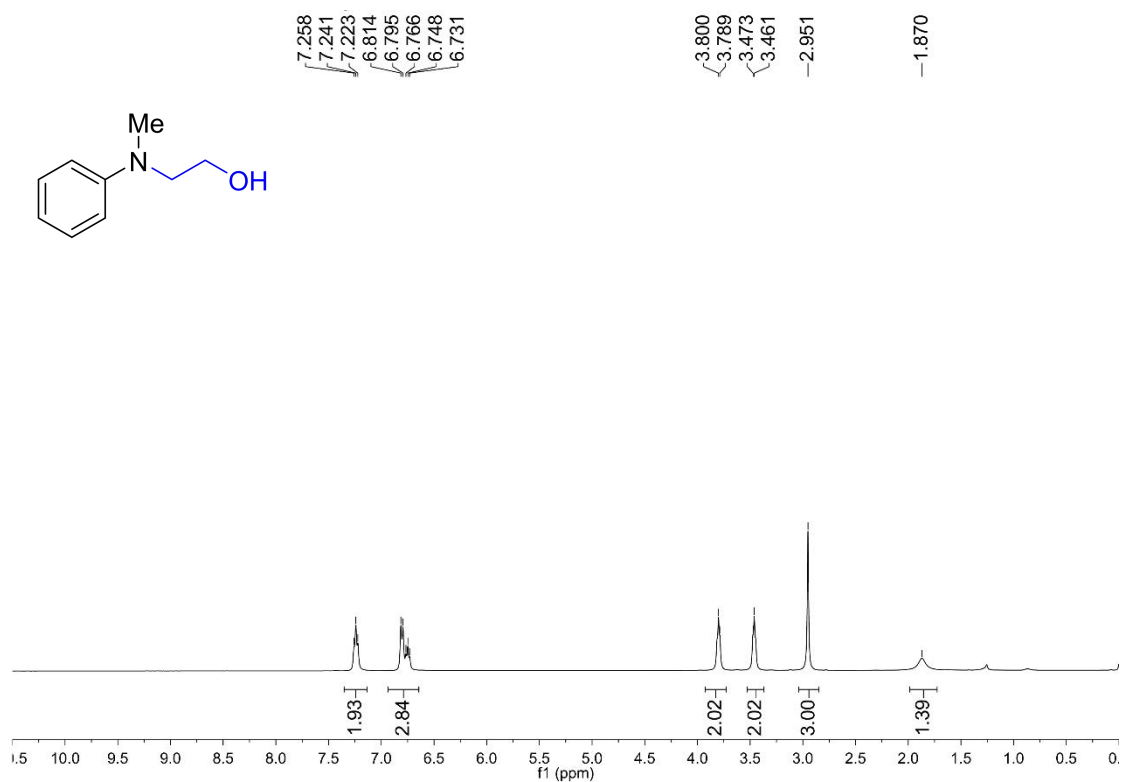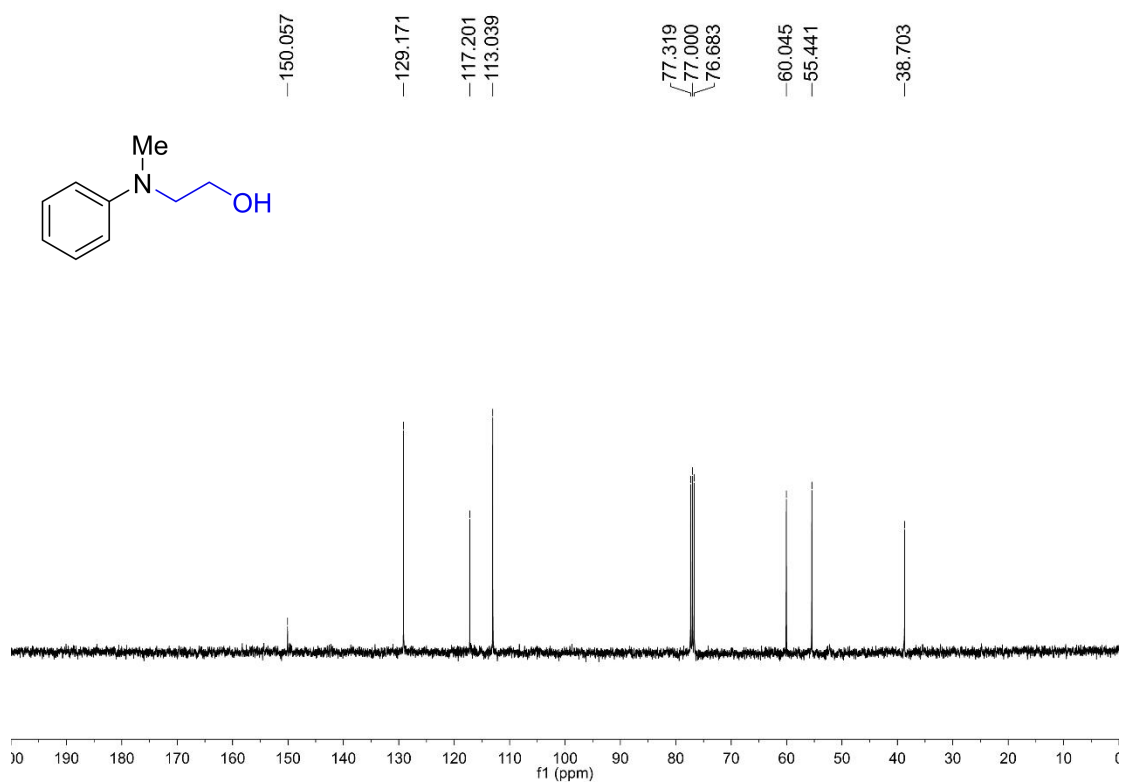

2-(methyl(p-tolyl)amino)ethan-1-ol (3b)

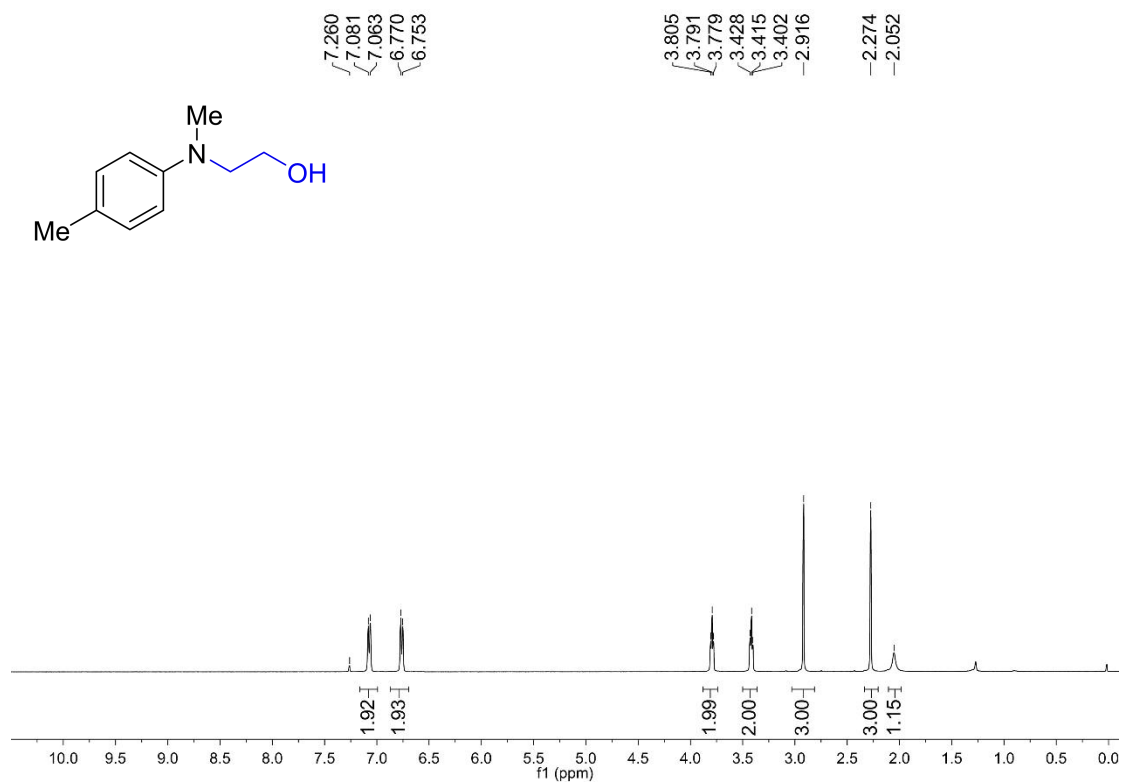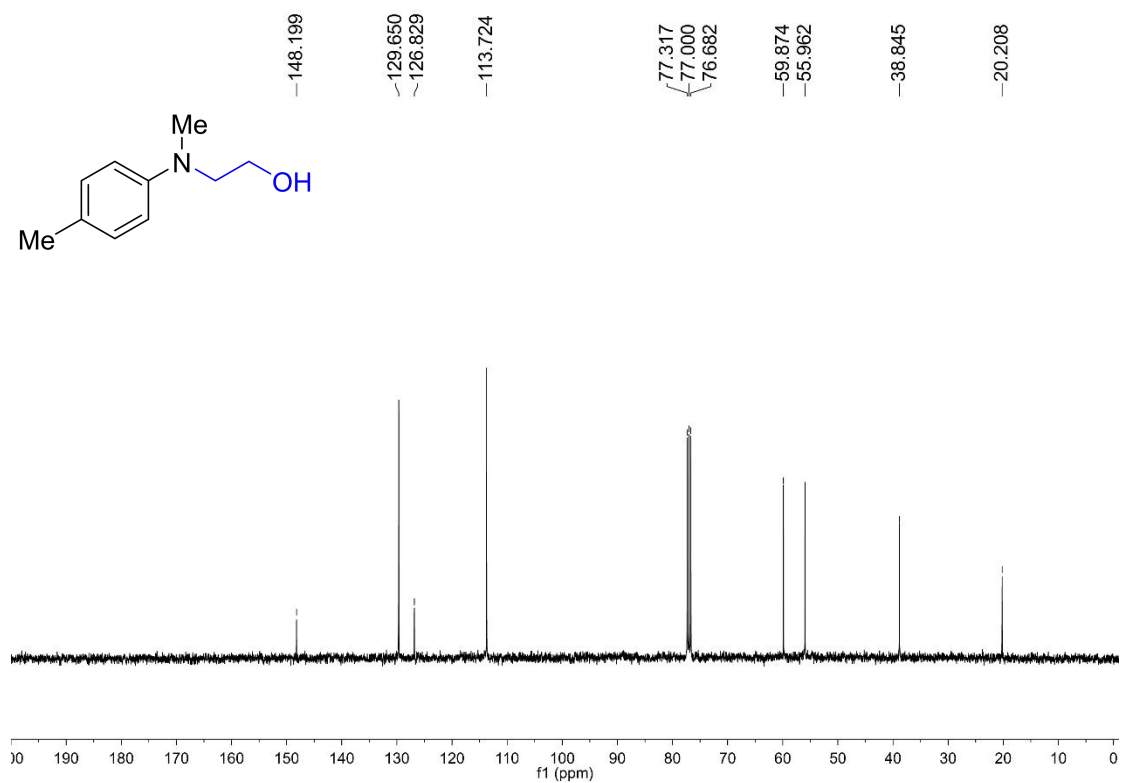

### 3-(methyl(m-tolyl)amino)ethan-1-ol (3c)

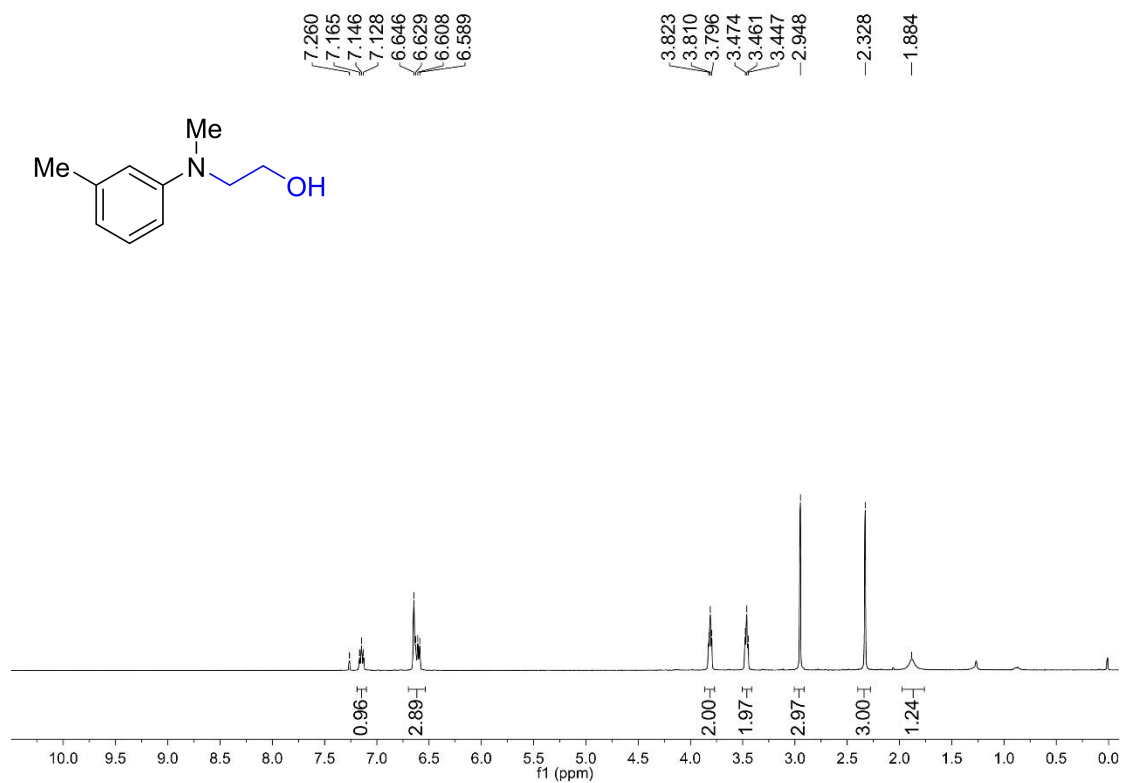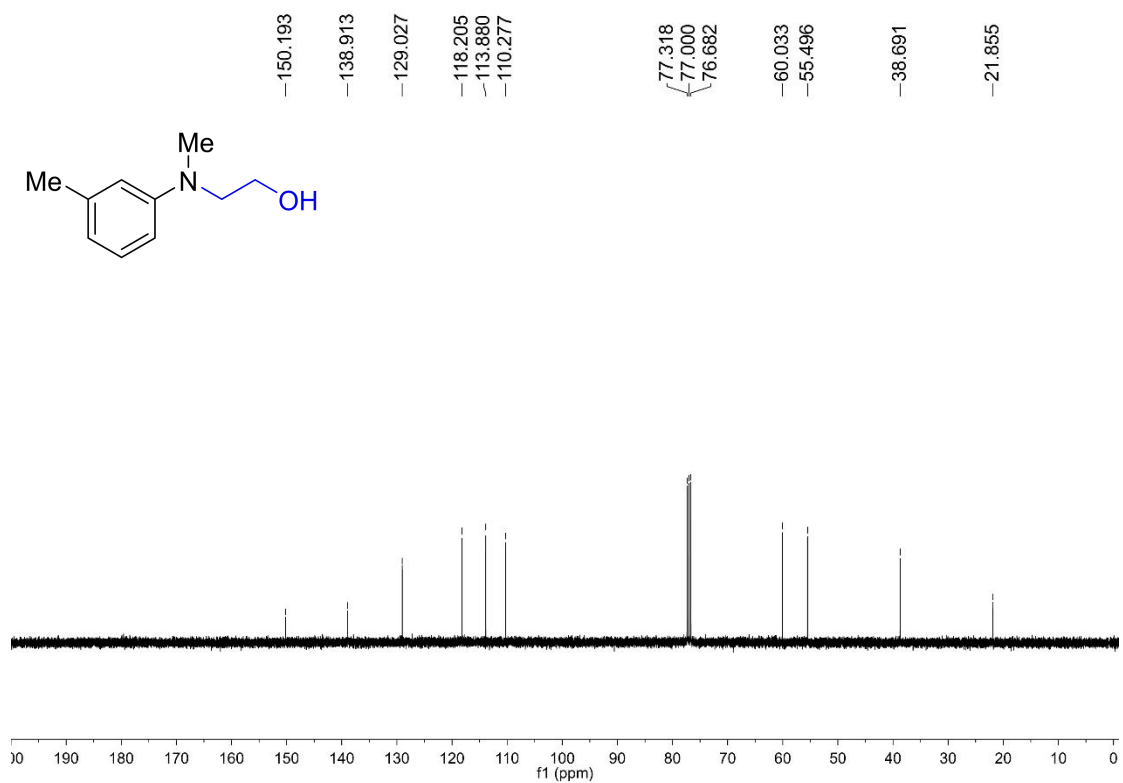

# 4-(methyl(o-tolyl)amino)ethan-1-ol (3d)

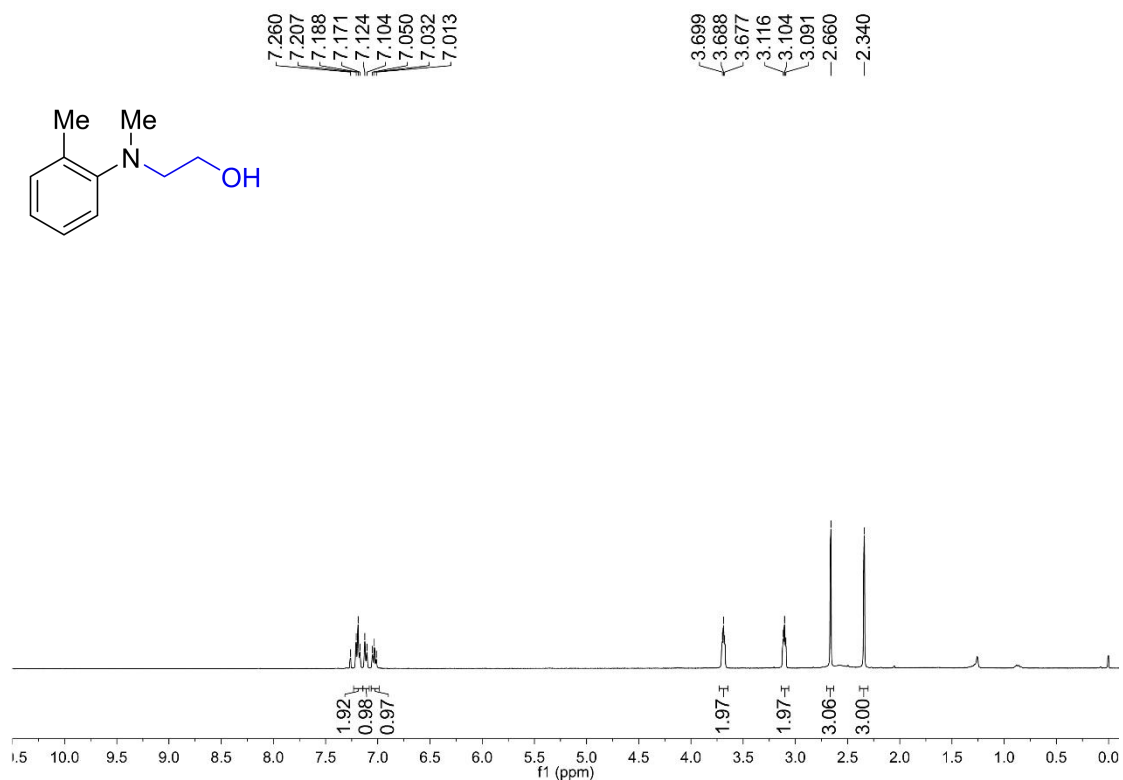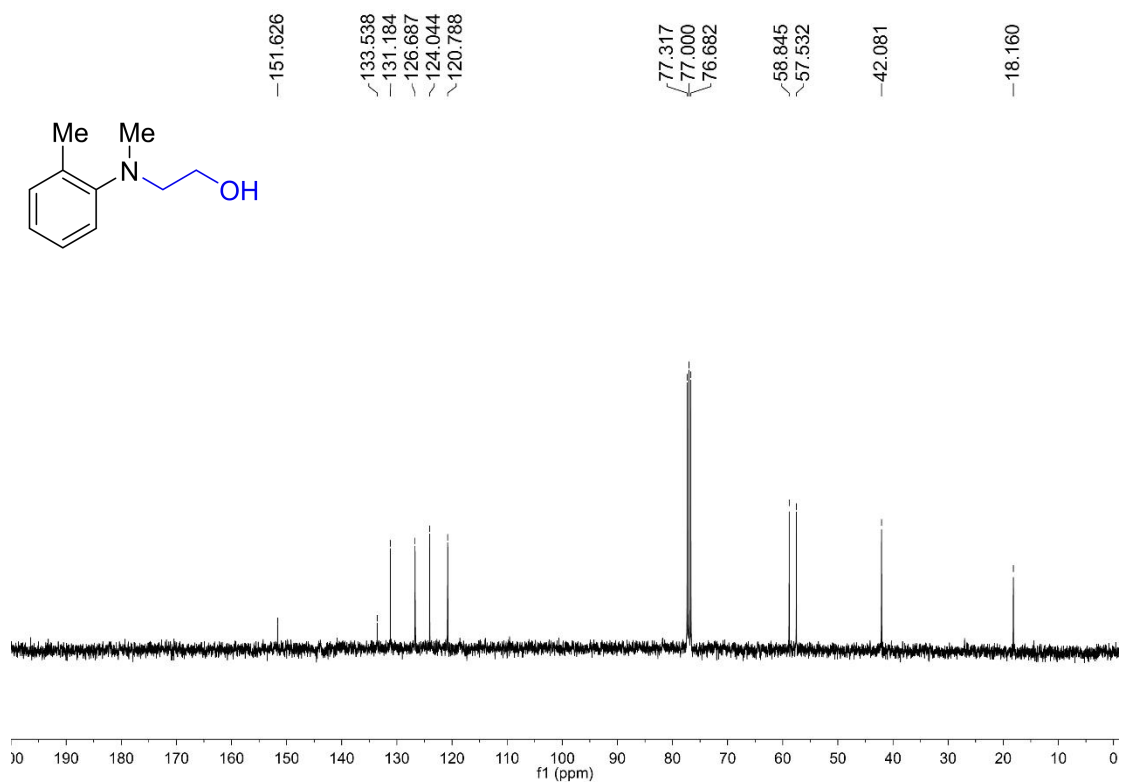

2-((4-fluorophenyl)(methyl)amino)ethan-1-ol (3e)

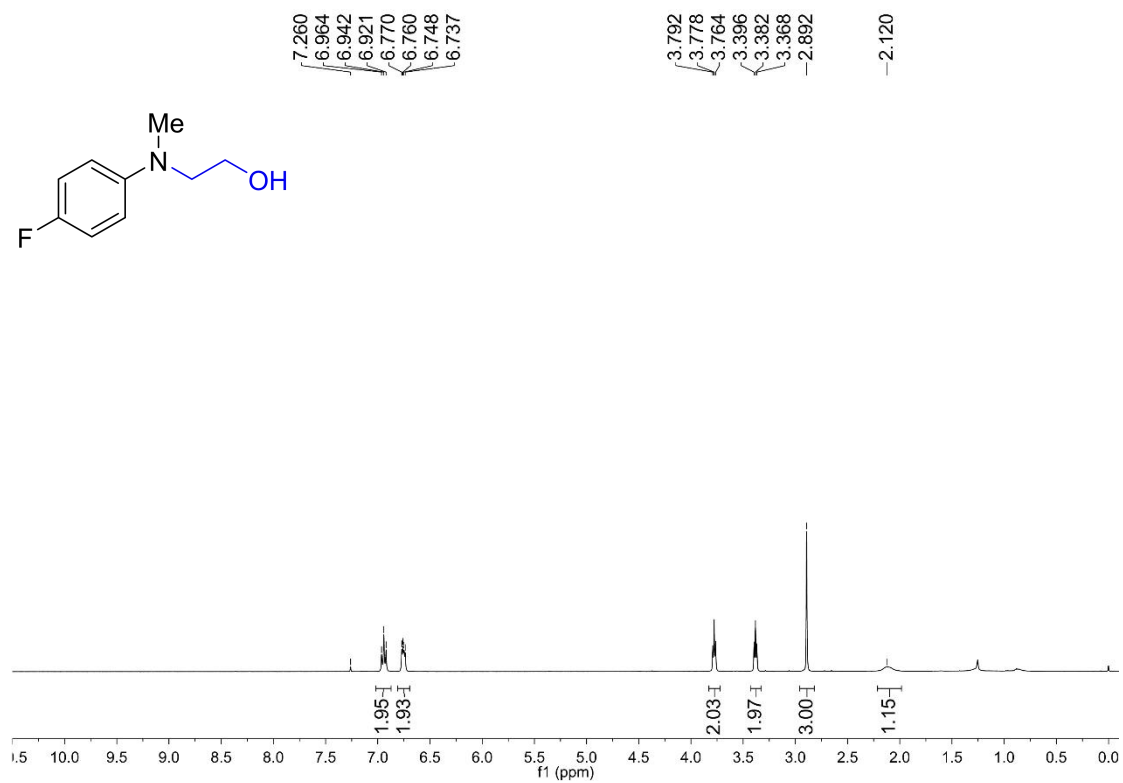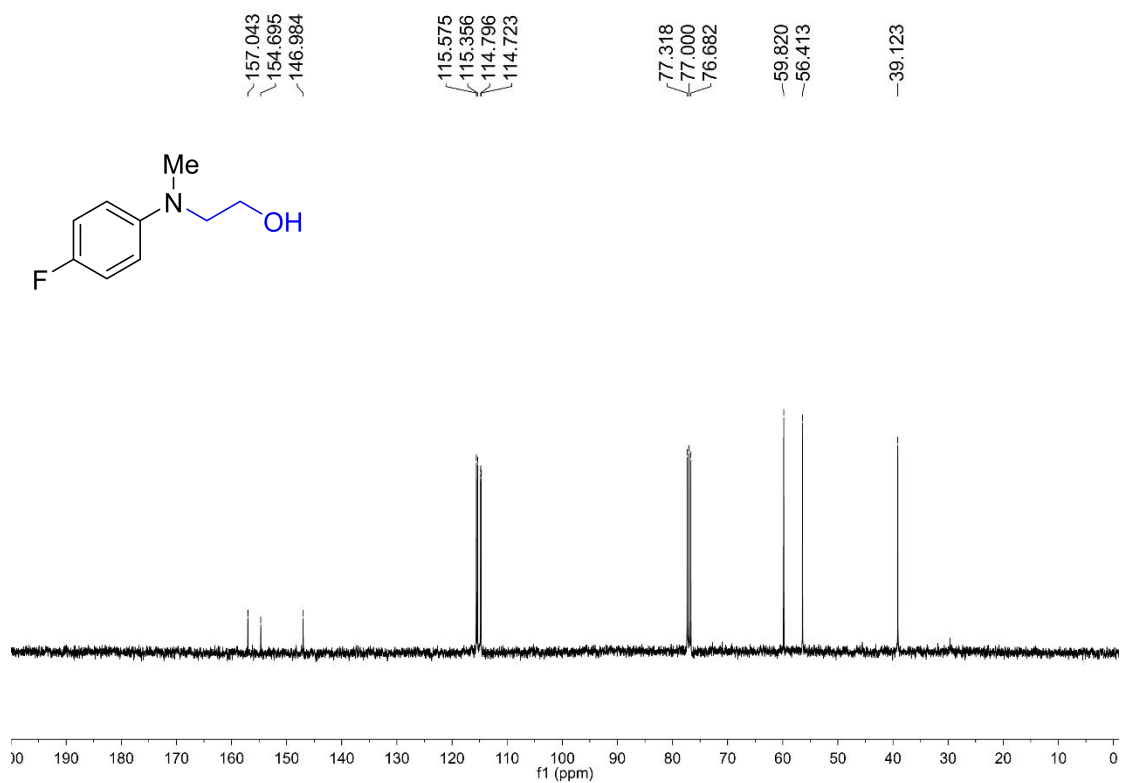

2-((4-chlorophenyl)(methyl)amino)ethan-1-ol (3f)

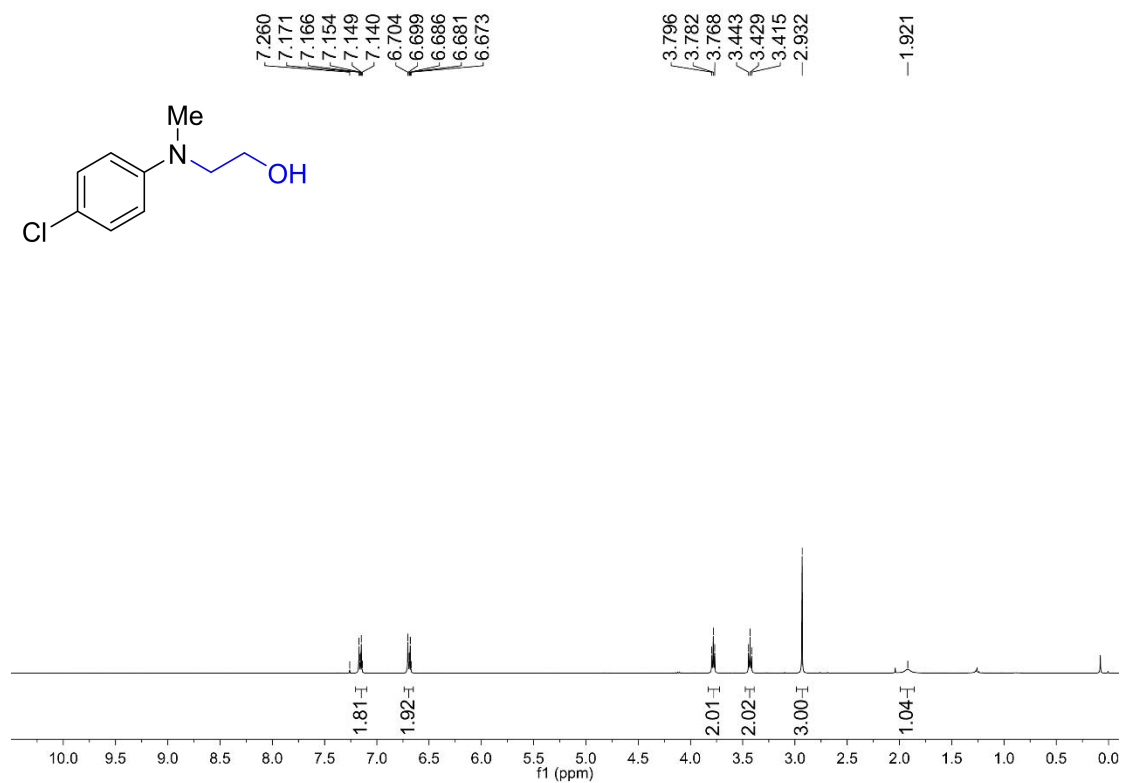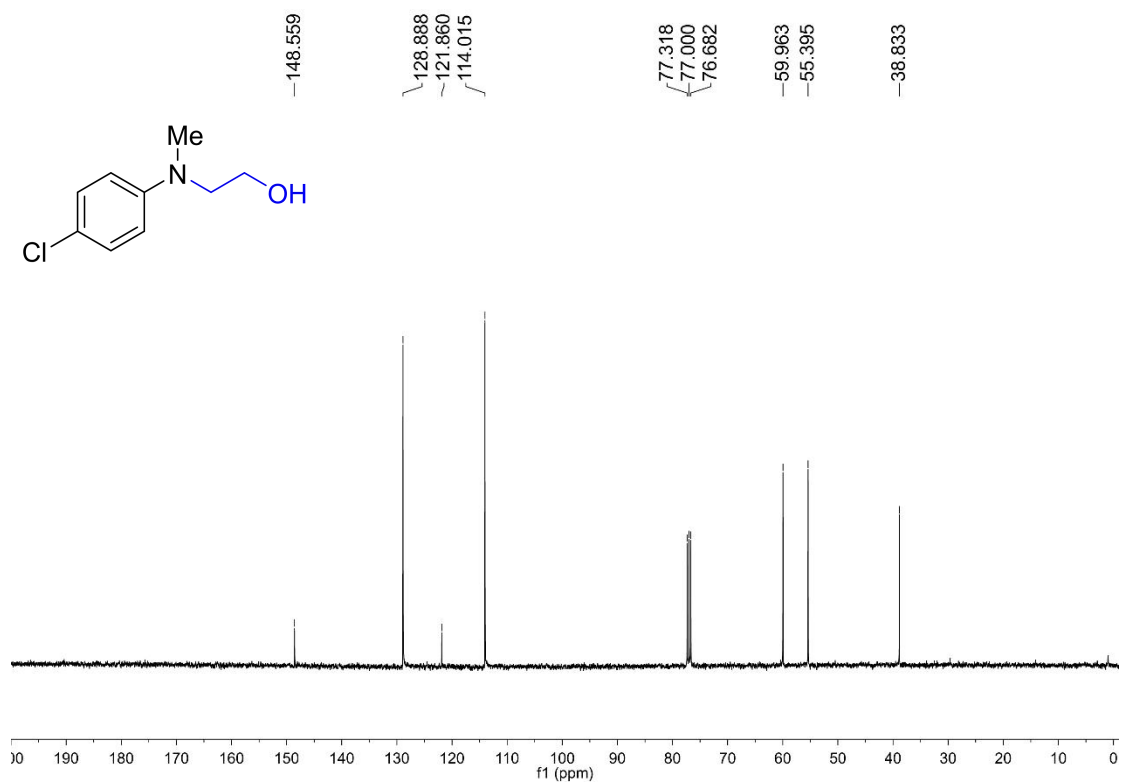



2-((3-chlorophenyl)(methyl)amino)ethan-1-ol (3g)

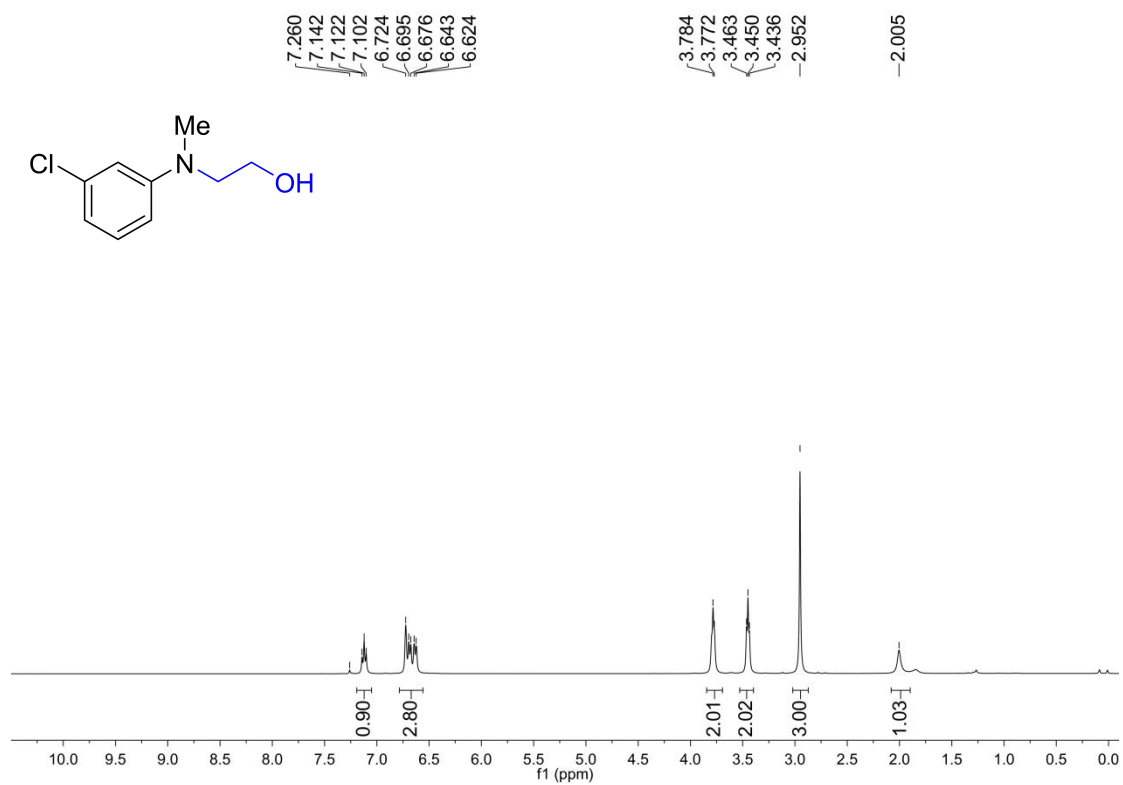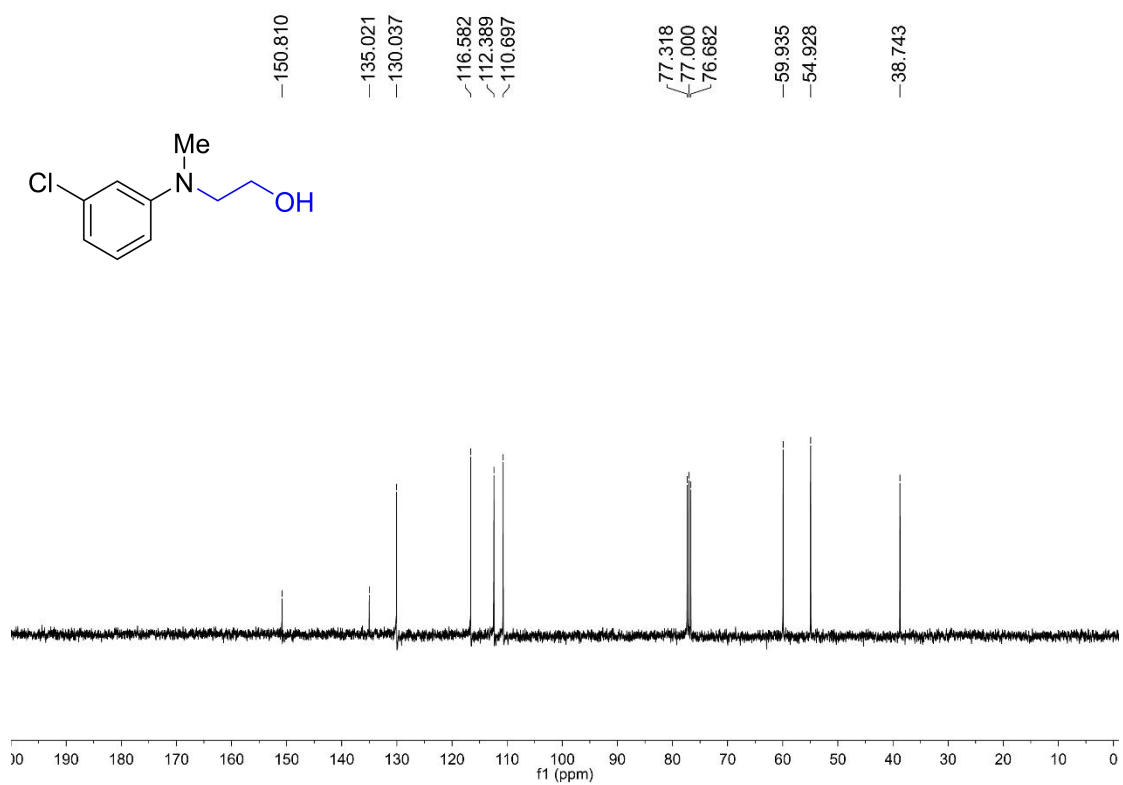

2-((4-bromophenyl)(methyl)amino)ethan-1-ol (3h)

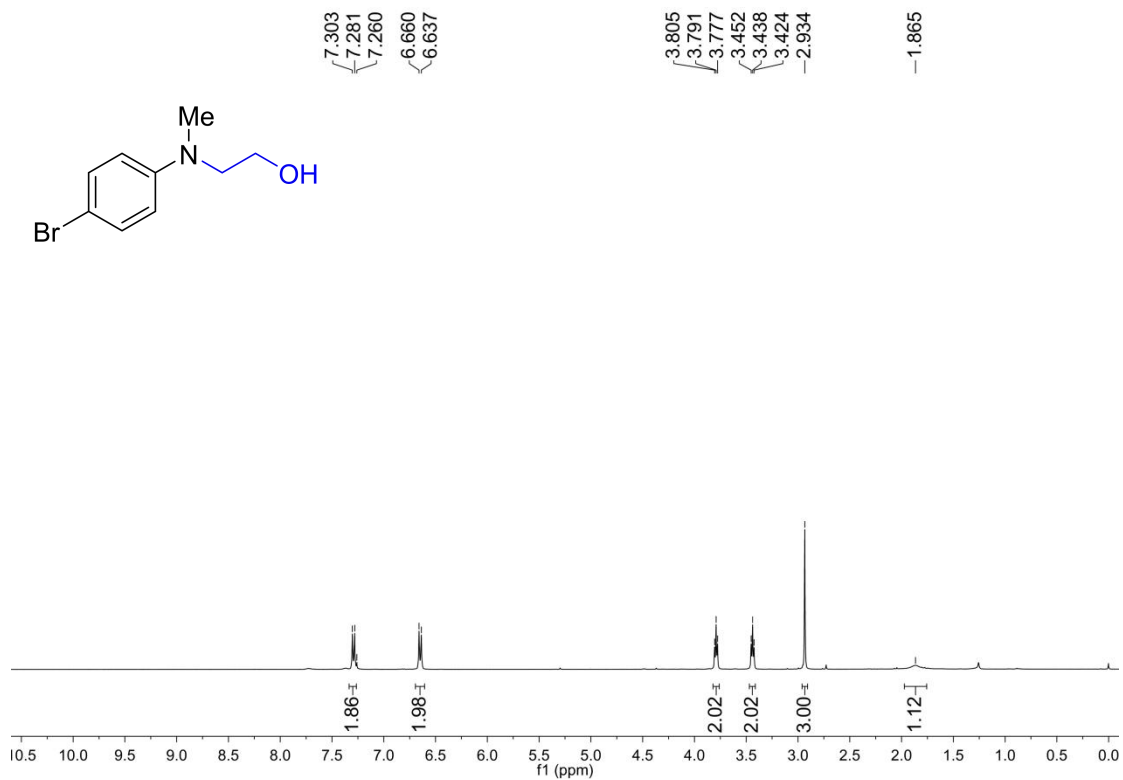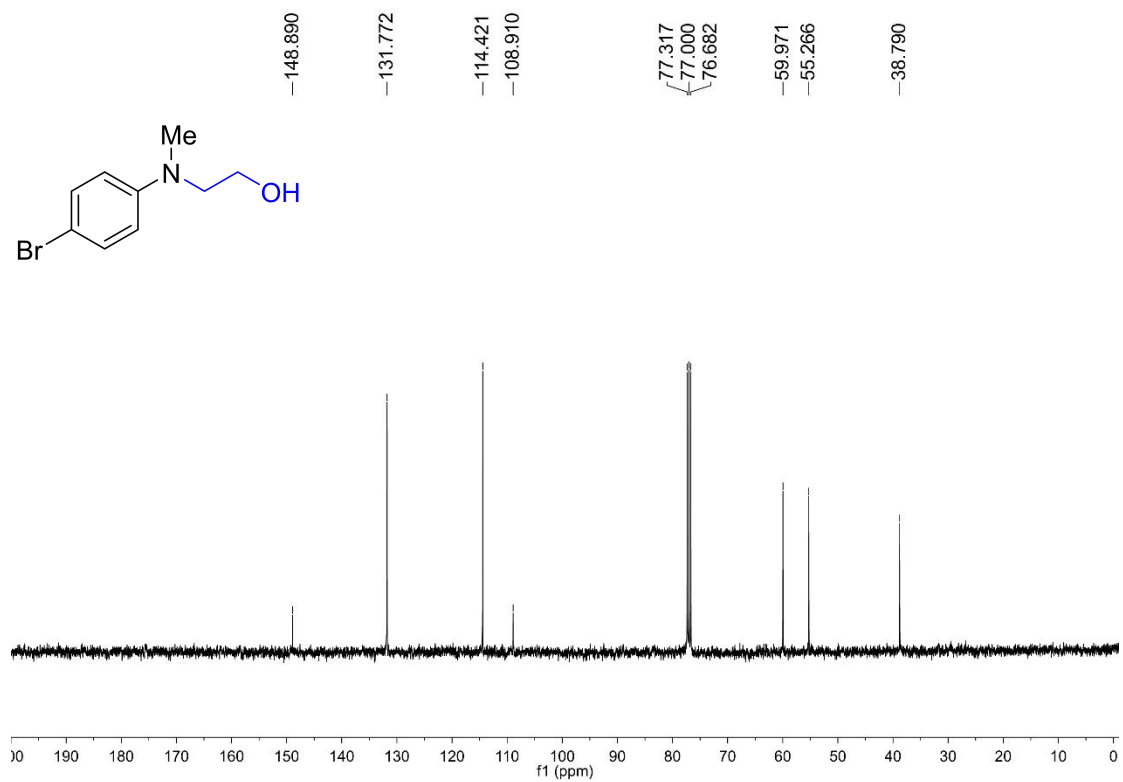

**2-(methyl(4-(trifluoromethyl)phenyl)amino)ethan-1-ol (3i)**

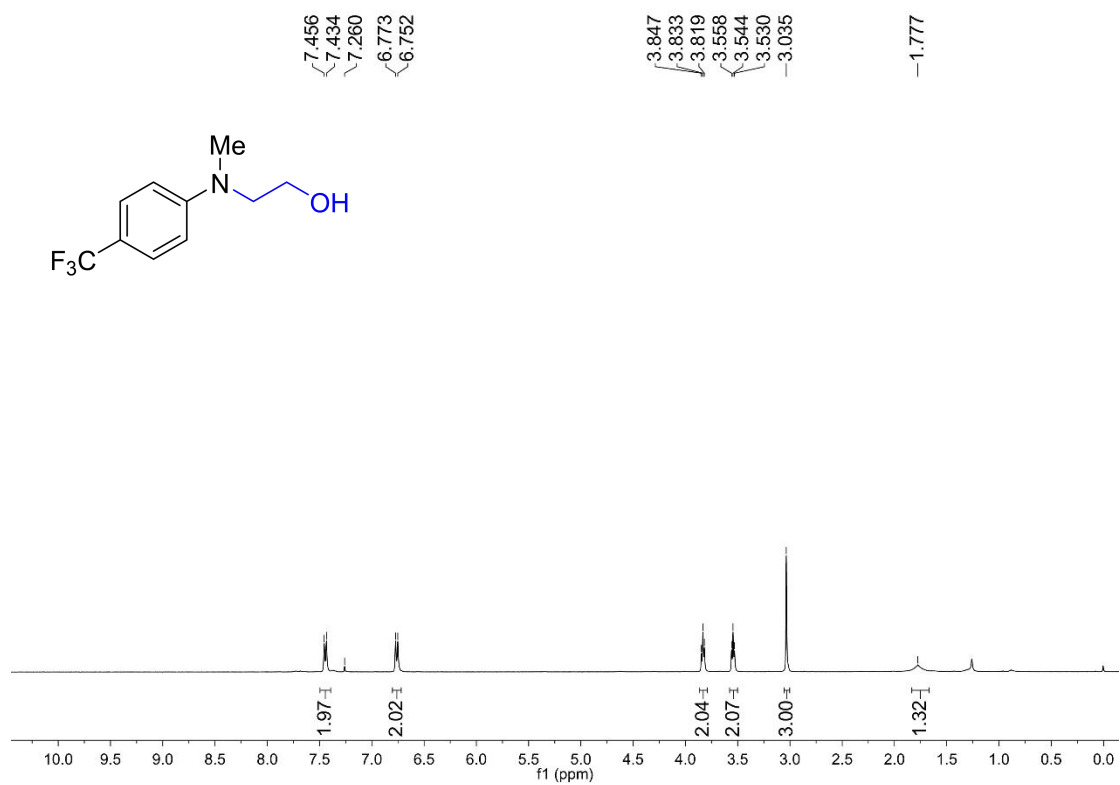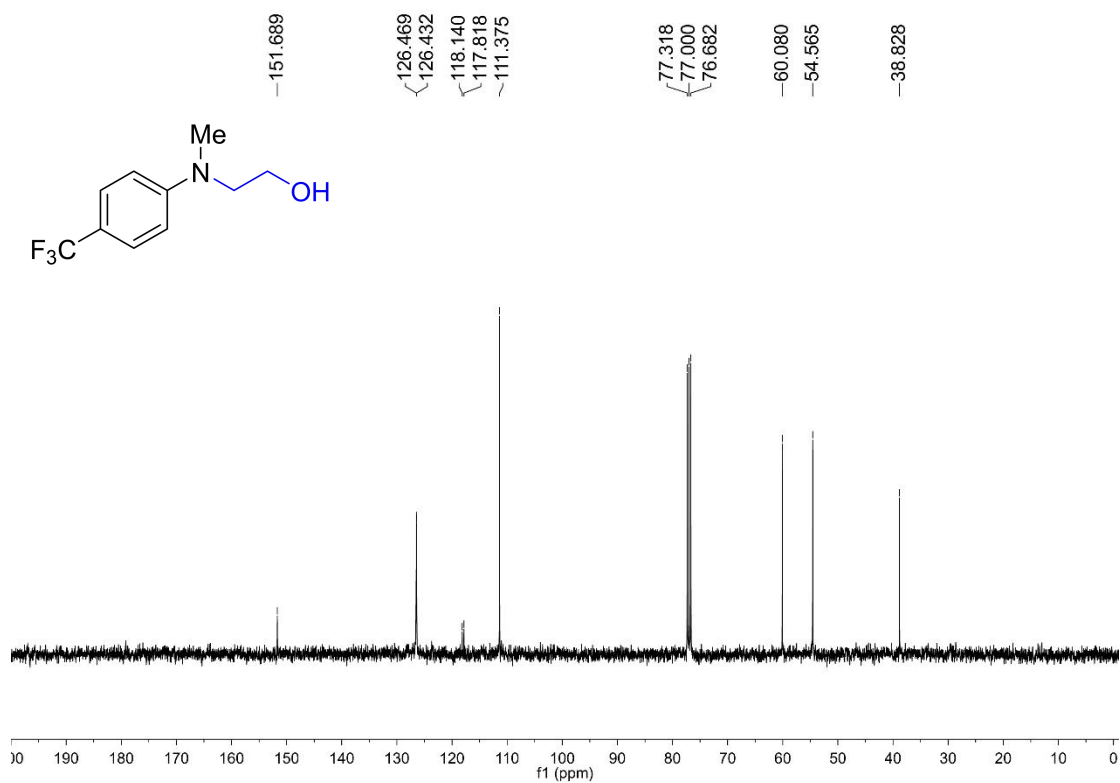

**1-((2-hydroxyethyl)(methyl)amino)phenyl)ethan-1-one (3j)**

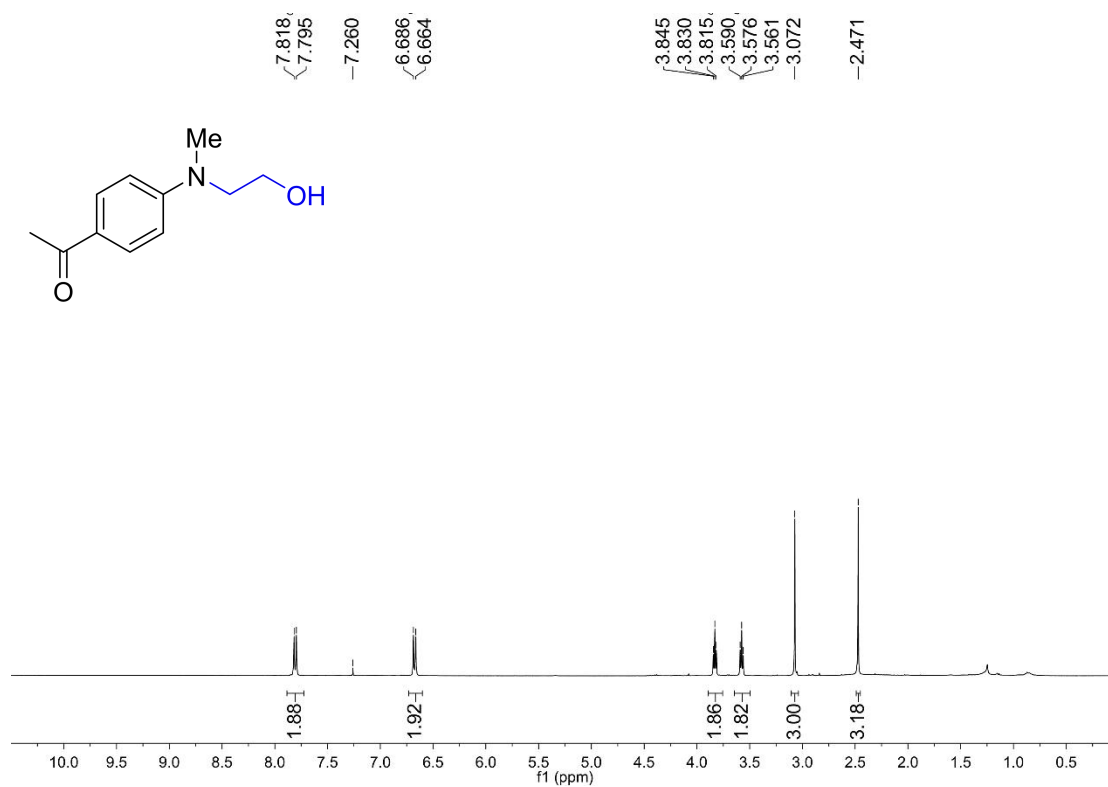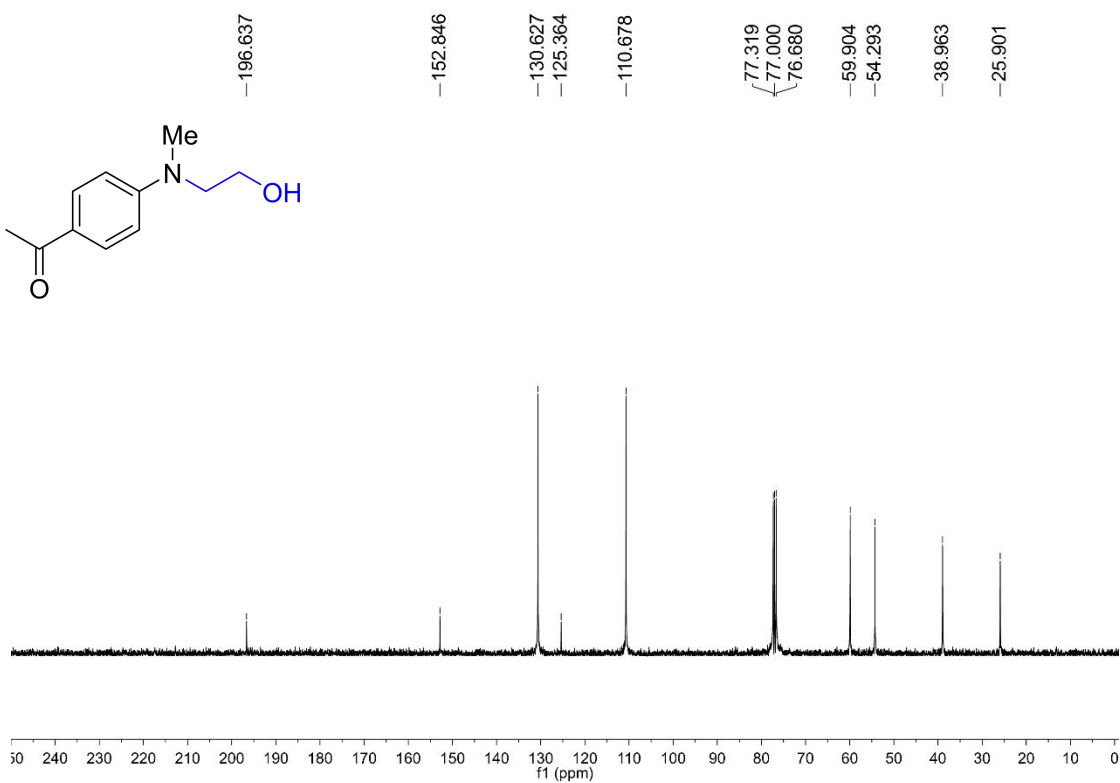

5-((2-hydroxyethyl)(methyl)amino)benzoic acid (3k)

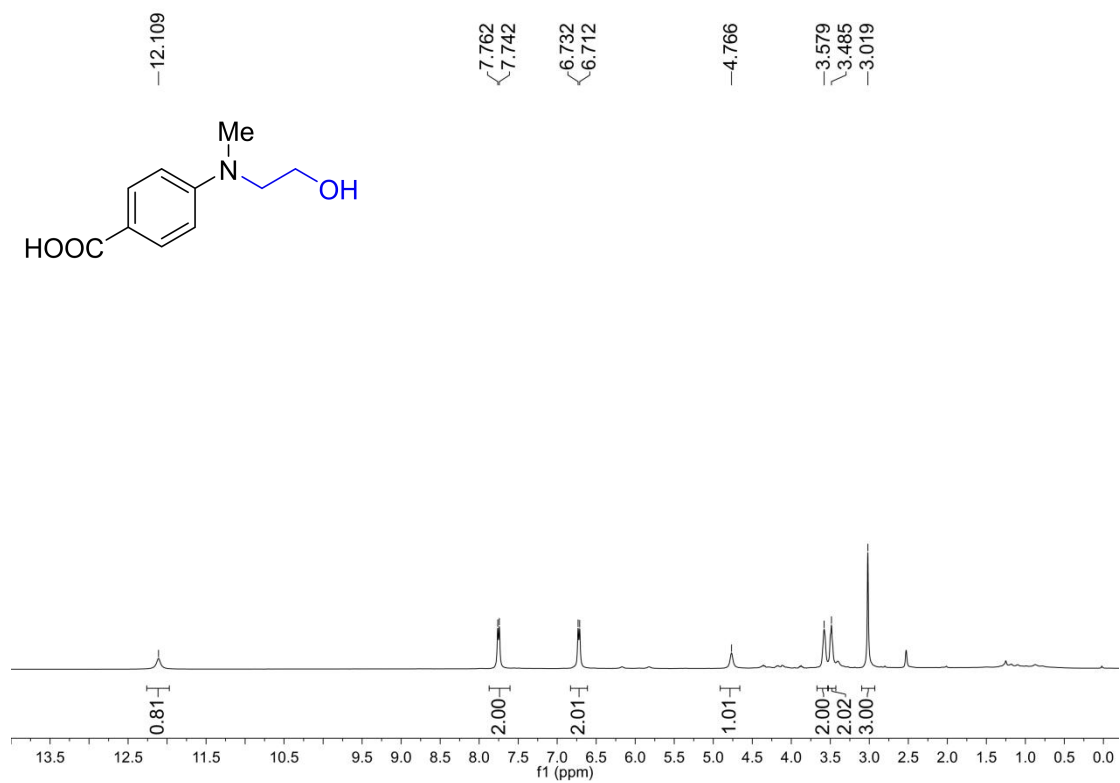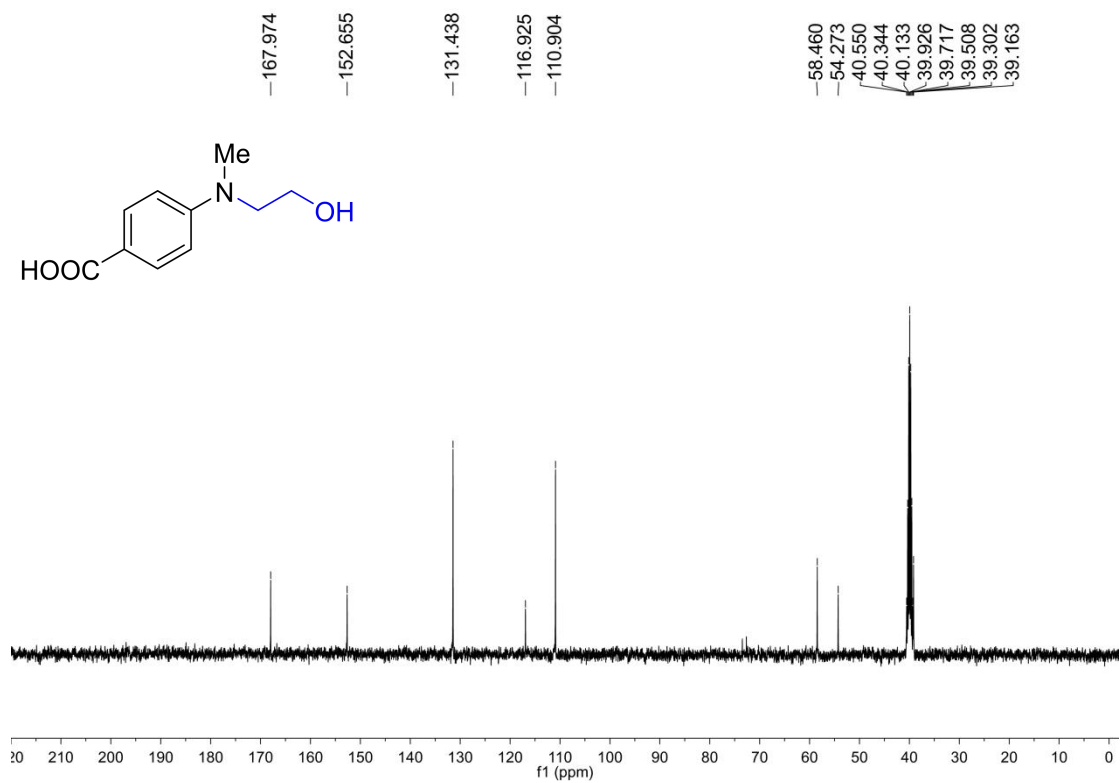

**methyl 4-((2-hydroxyethyl)(methyl)amino)benzoate (3l)**

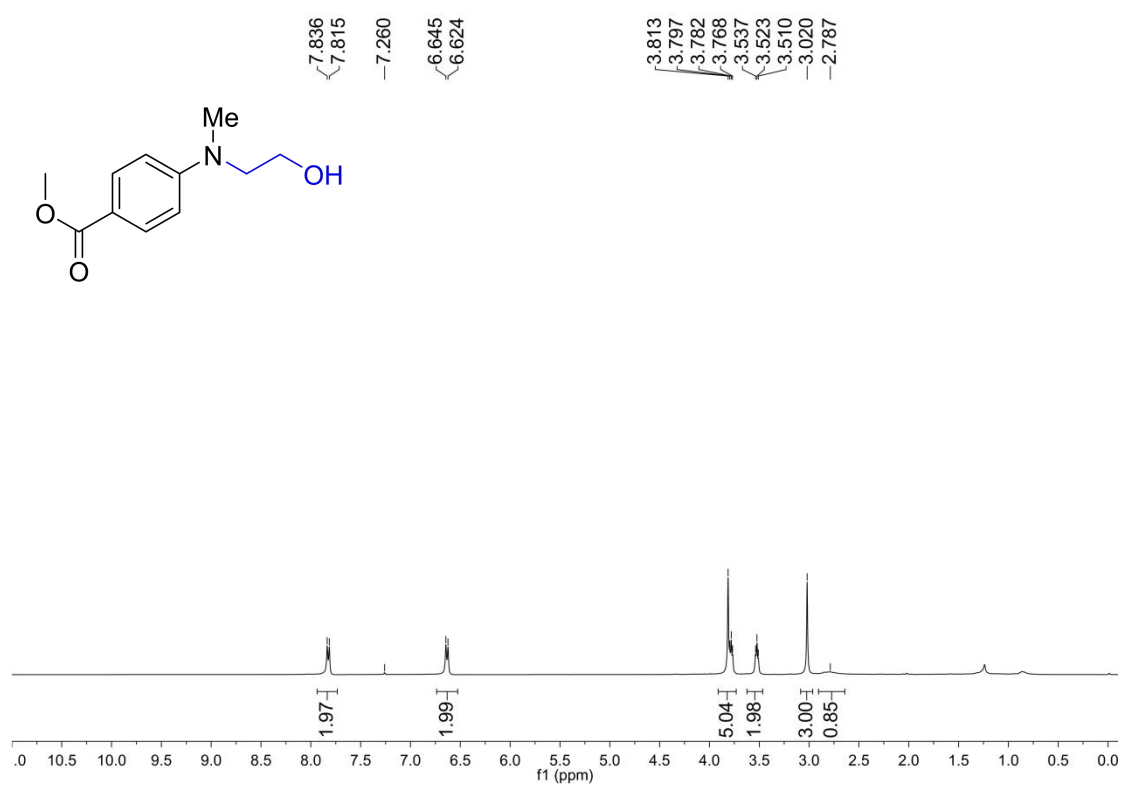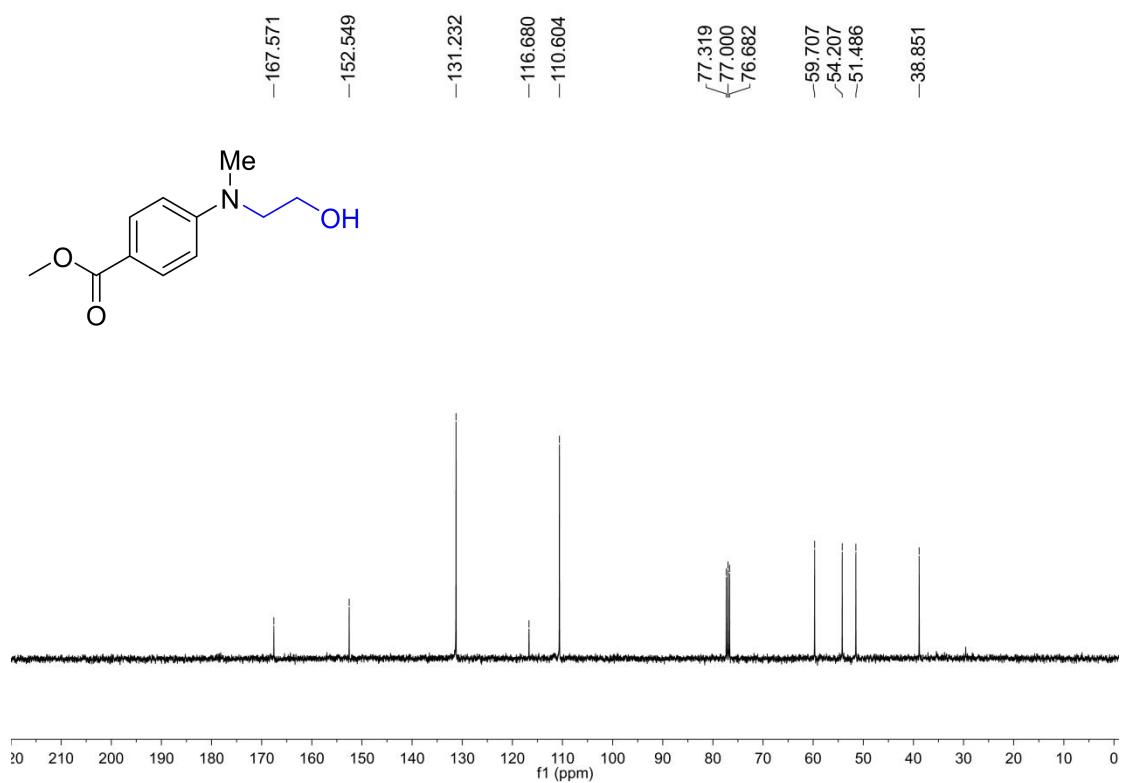

# 2-(ethyl(phenyl)amino)ethan-1-ol (3n)

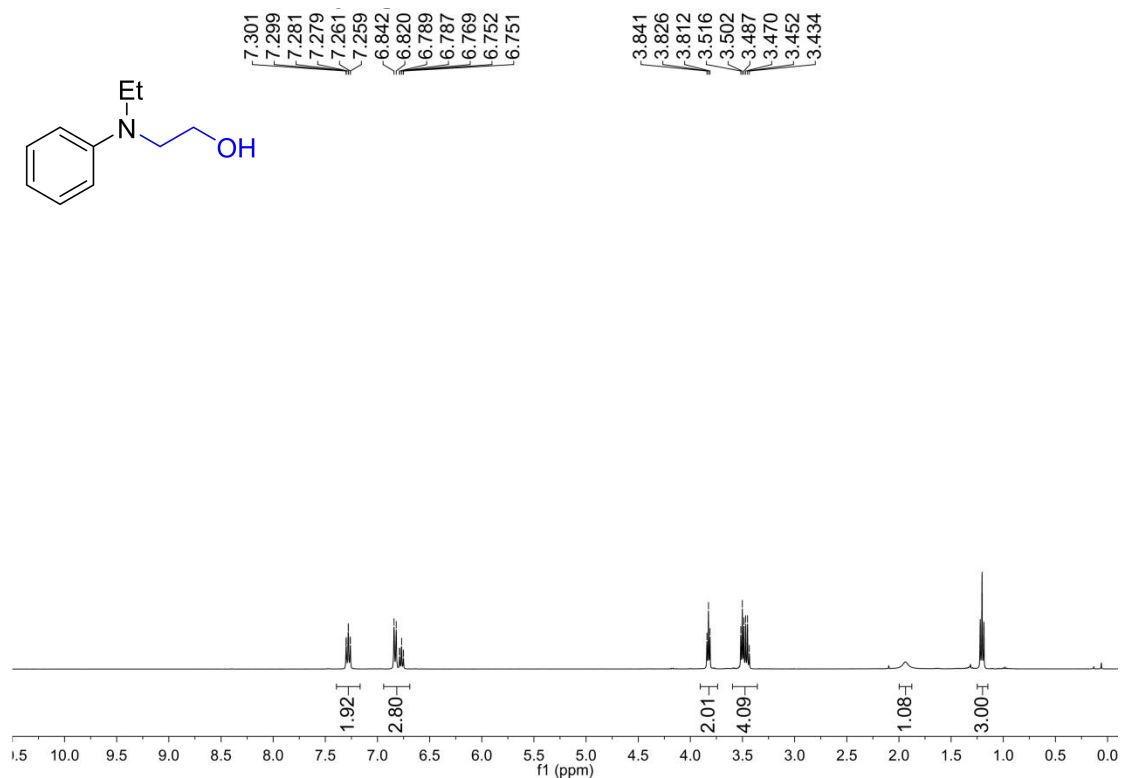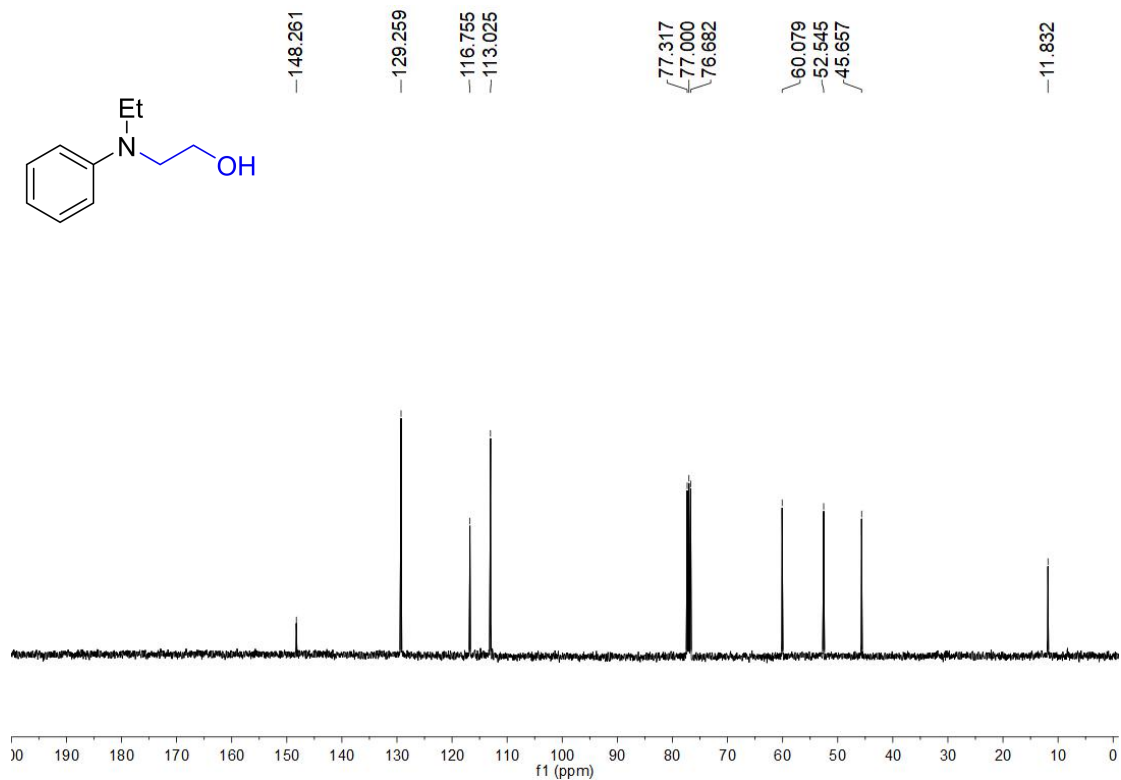

# 2-(isopropyl(phenyl)amino)ethan-1-ol (3o)

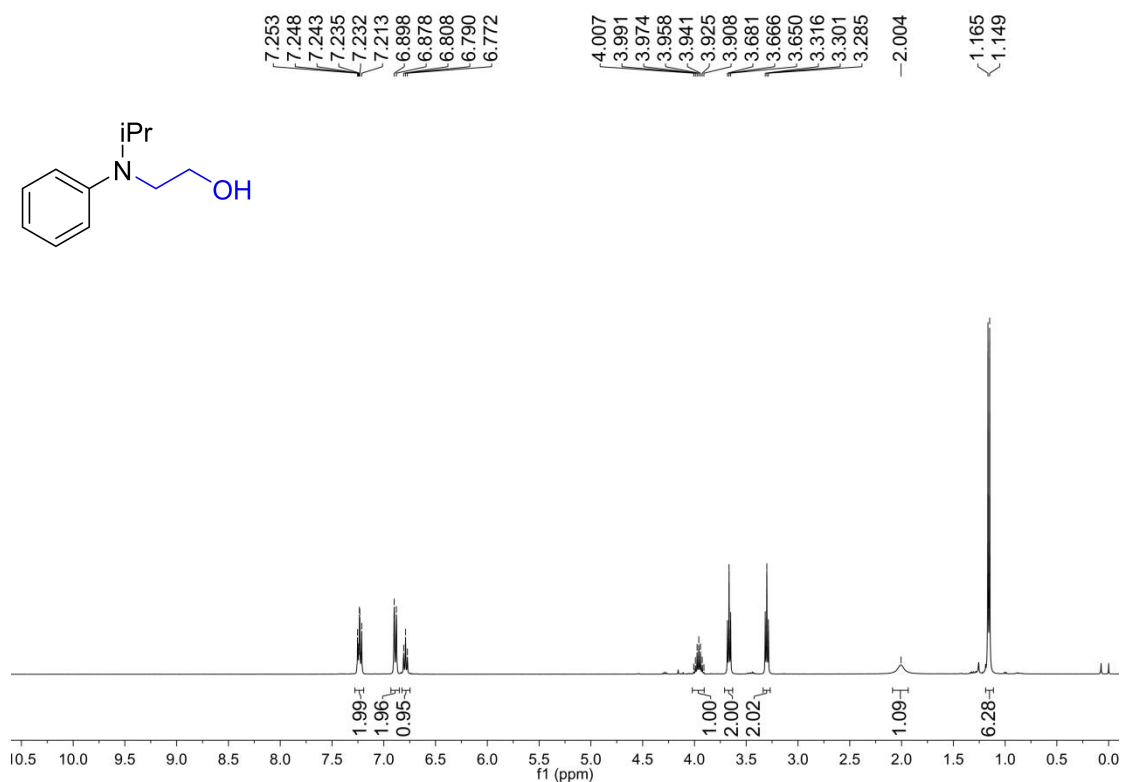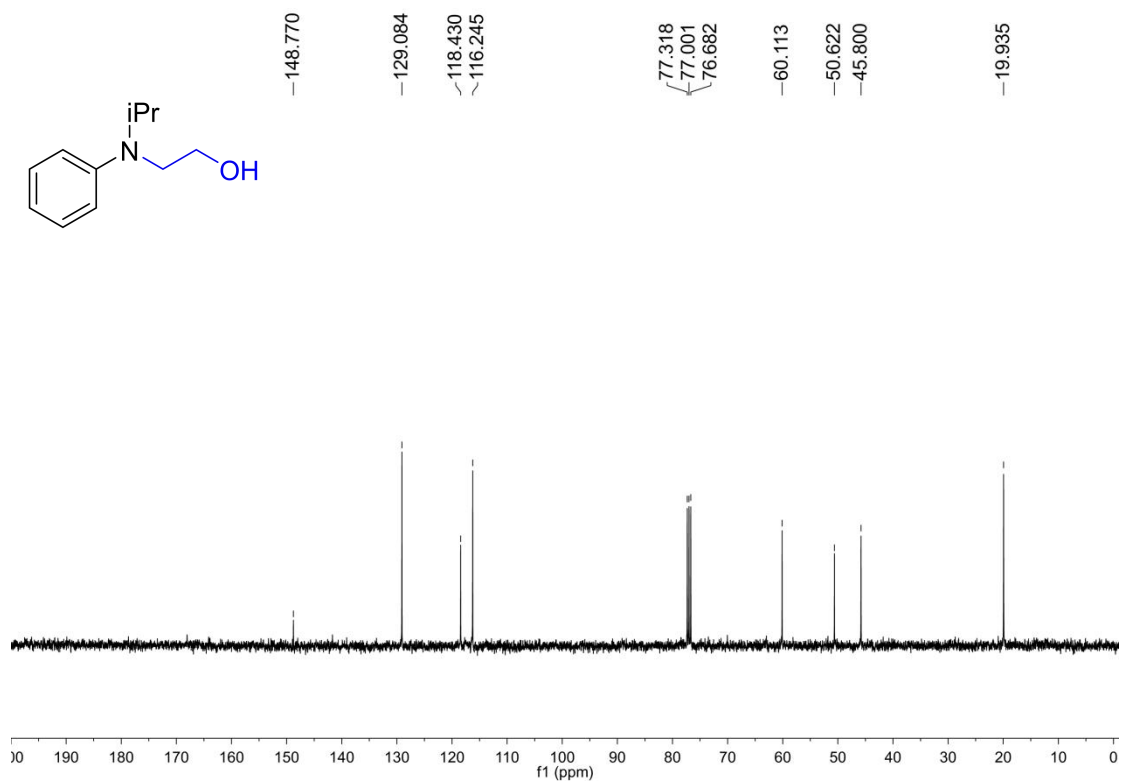



# 2-(butyl(phenyl)amino)ethan-1-ol (3p)

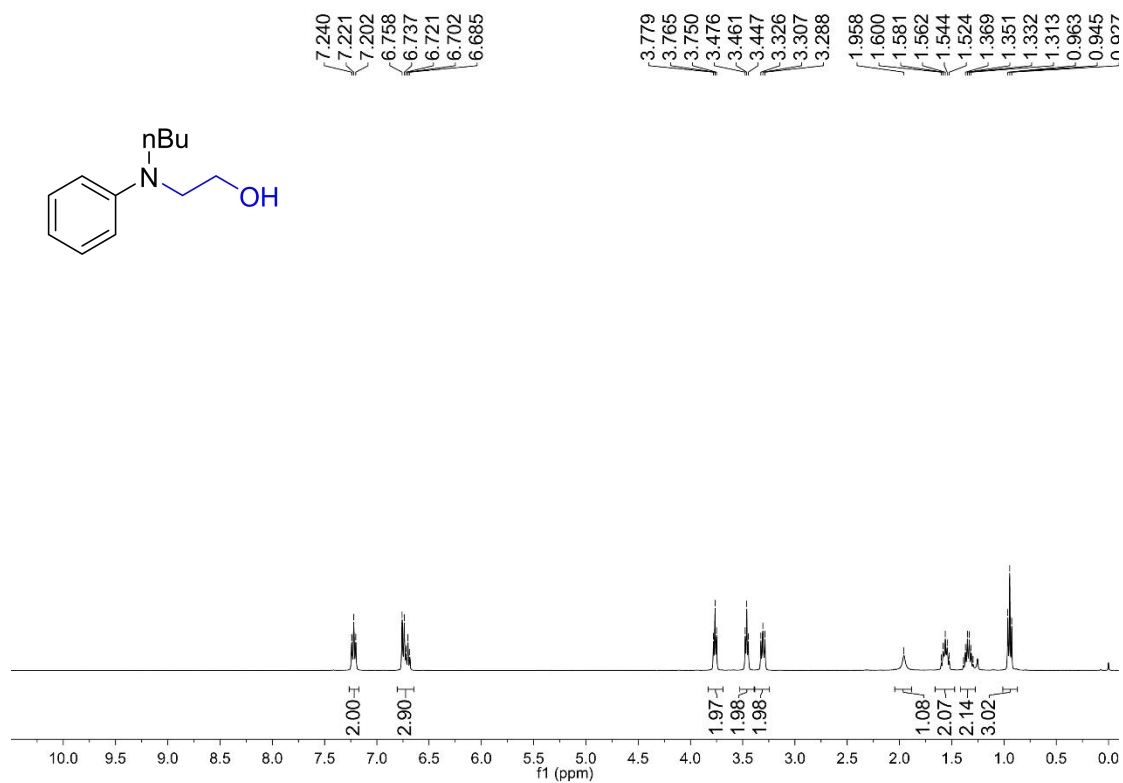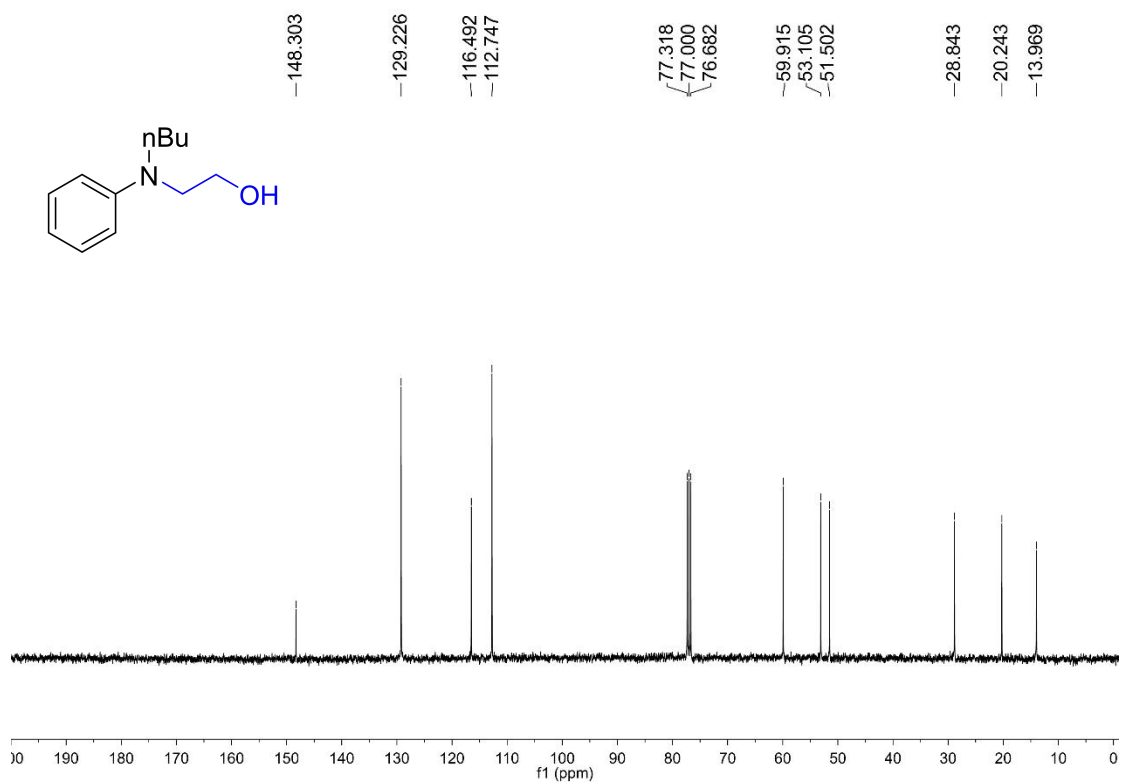

2-(dodecyl(phenyl)amino)ethan-1-ol (3q)

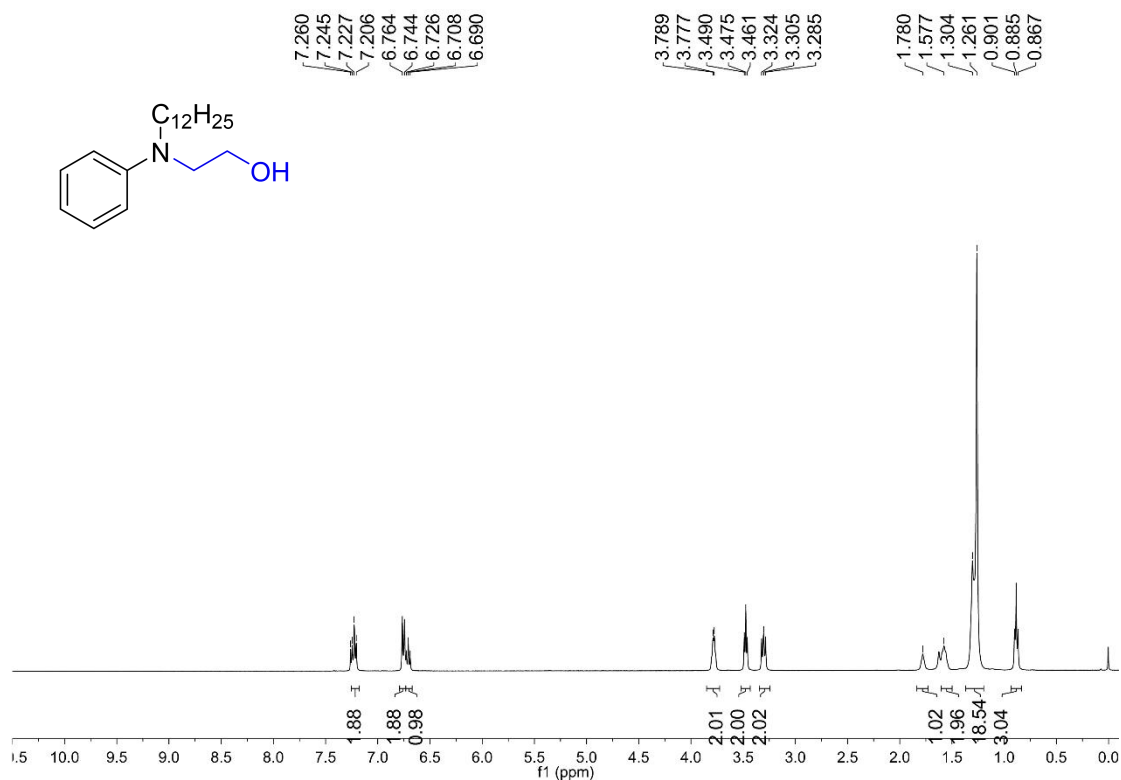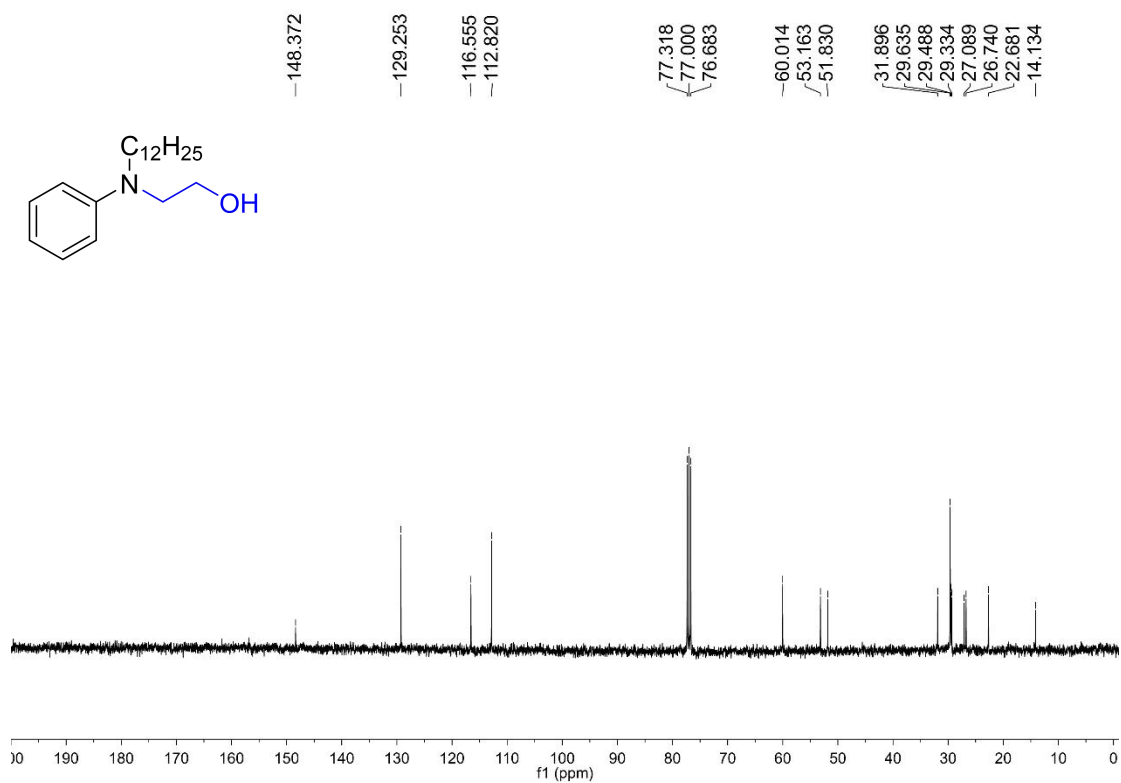

# 2-(cyclohexyl(phenyl)amino)ethan-1-ol (3r)

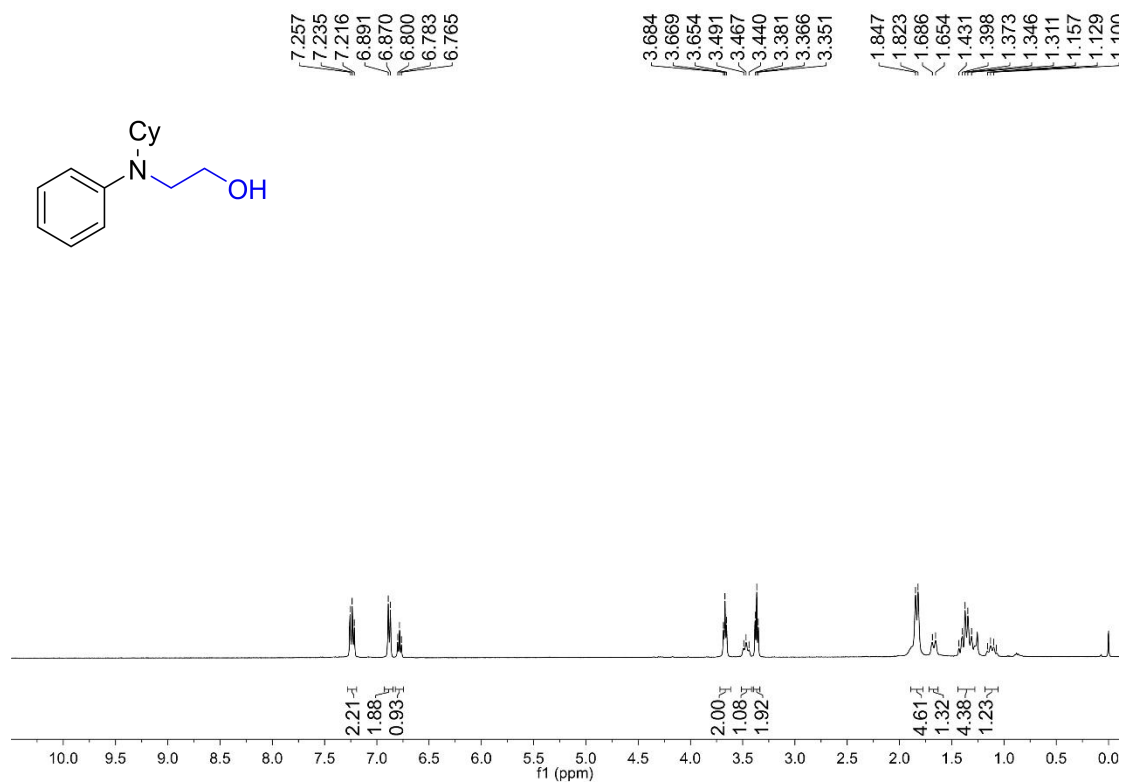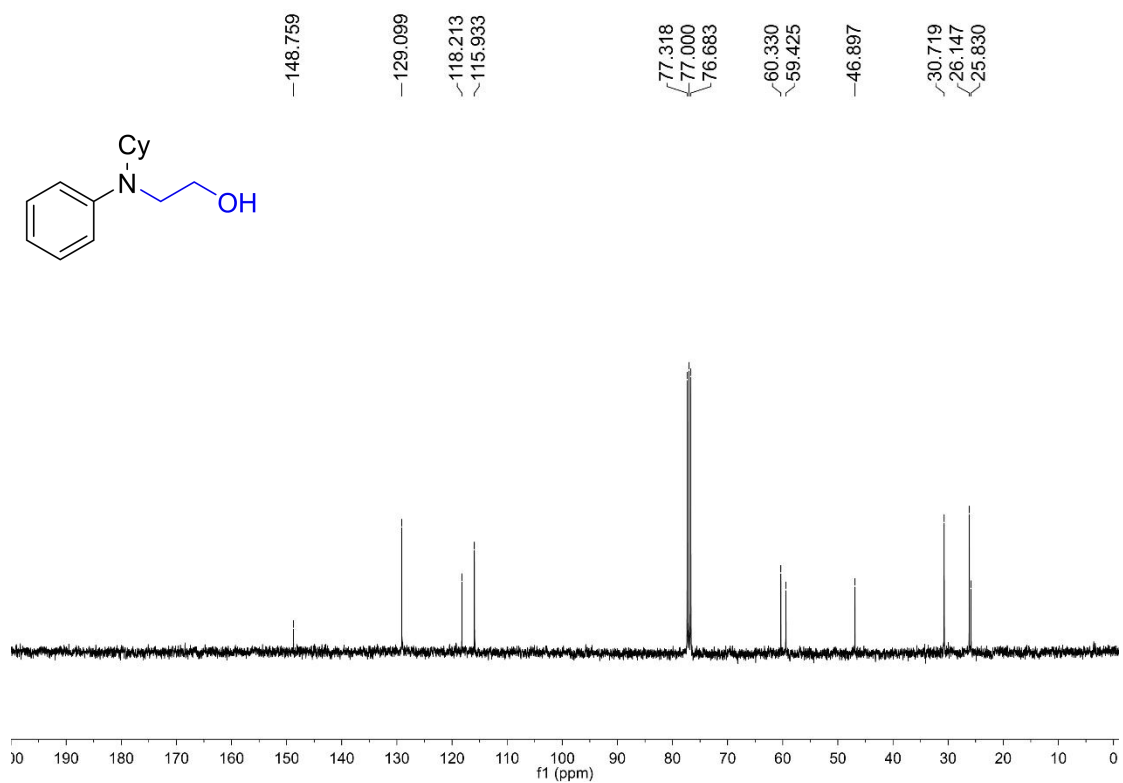

**2-(benzyl(phenyl)amino)ethan-1-ol (3s)**

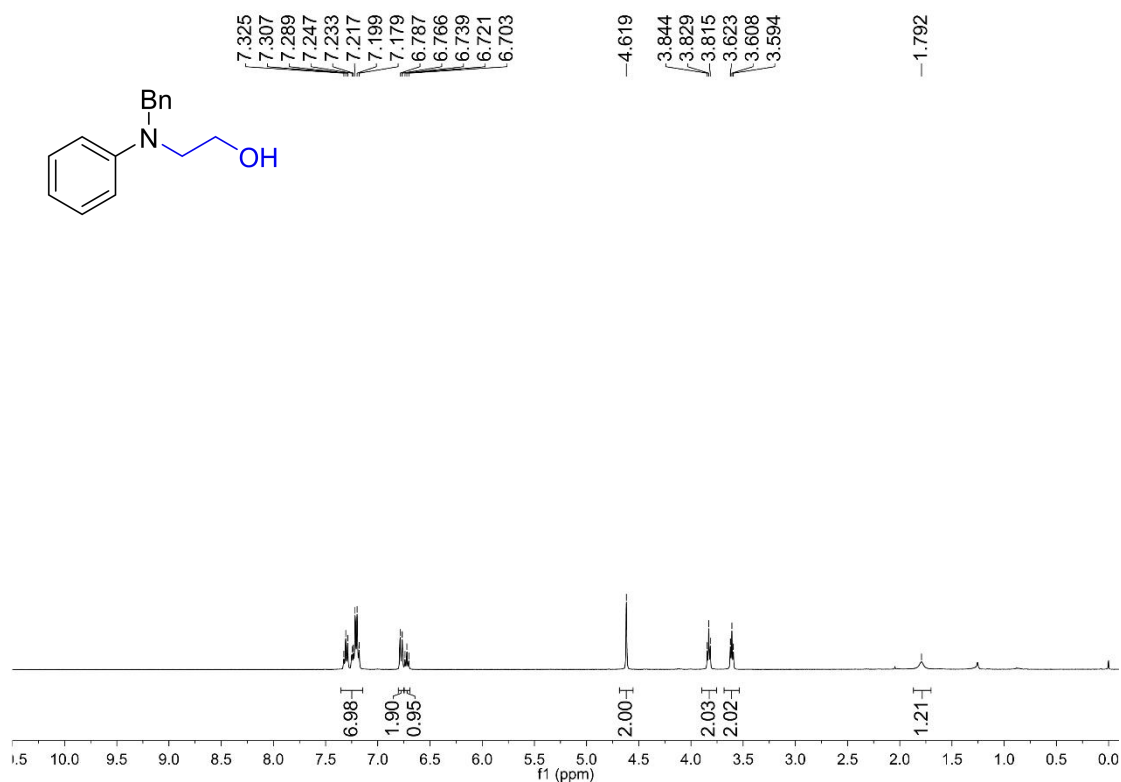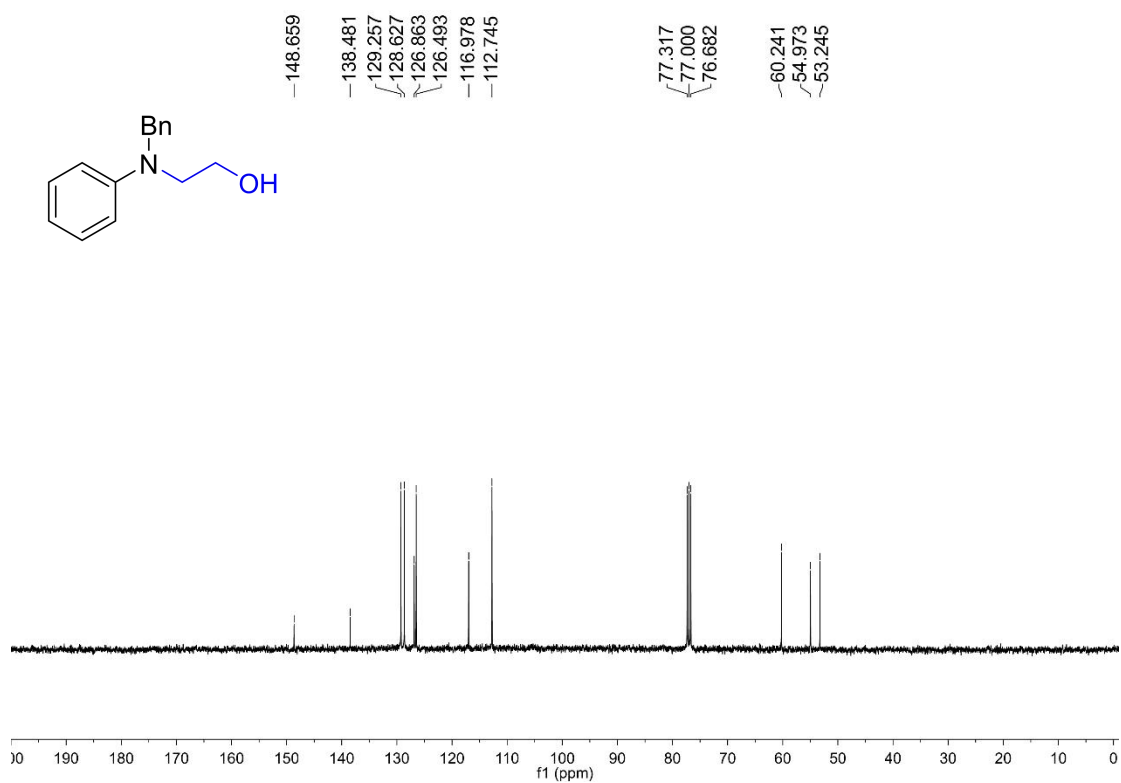

# 2-(diphenylamino)ethan-1-ol (3t)

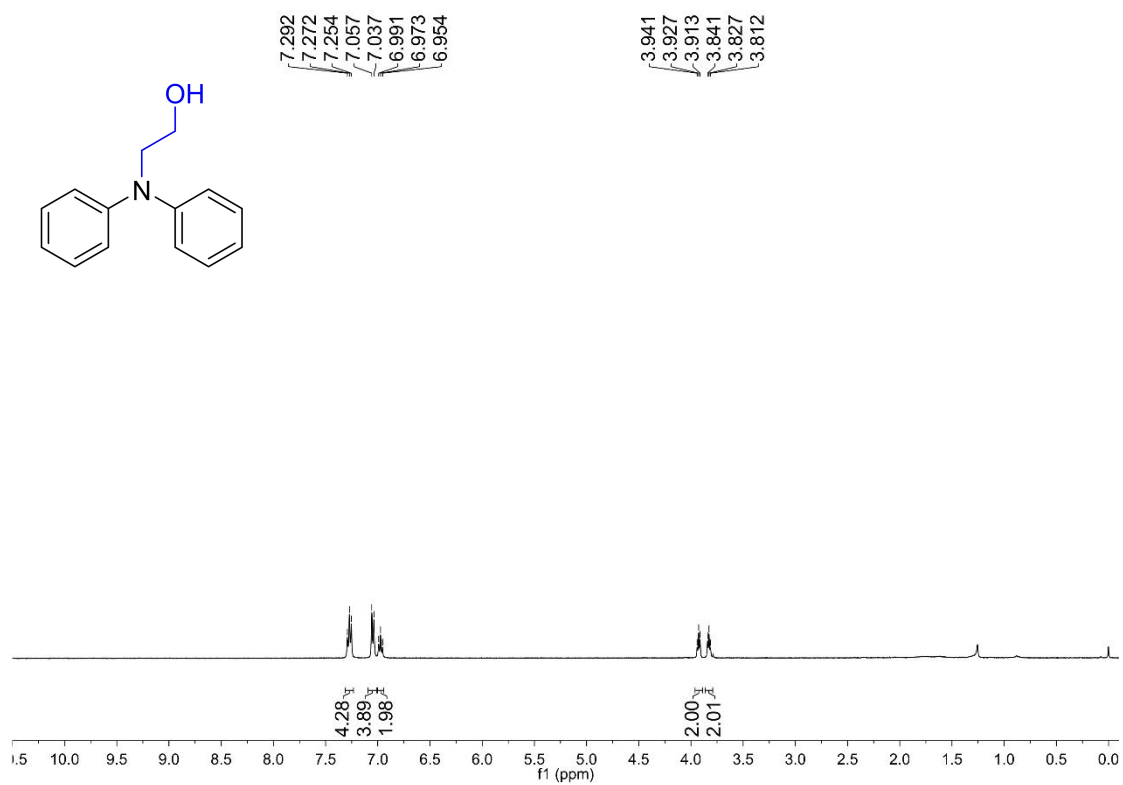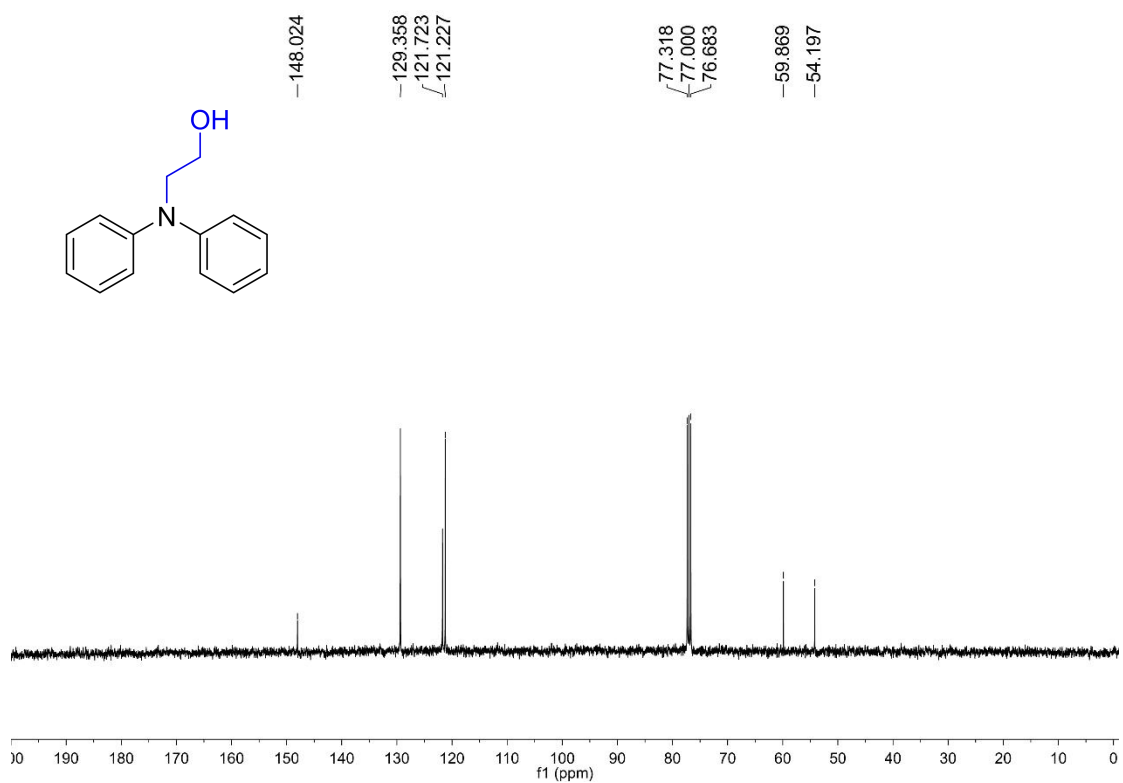

## 2-(methyl(naphthalen-1-yl)amino)ethan-1-ol (3u)

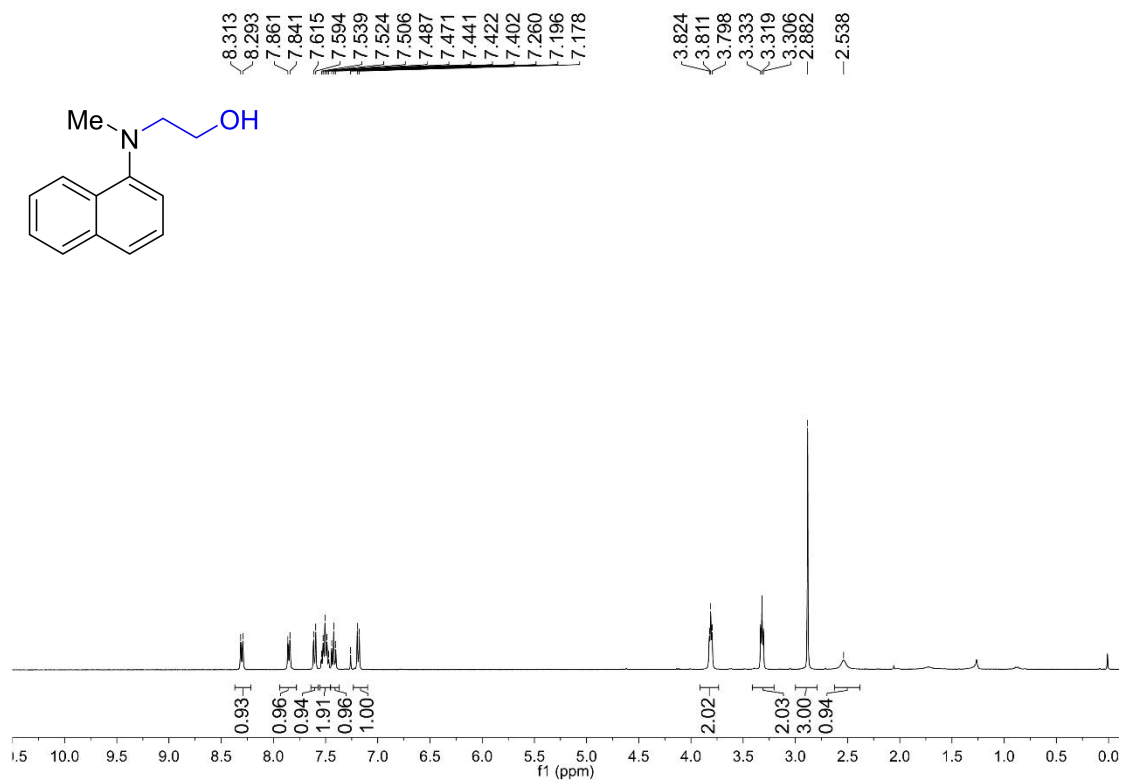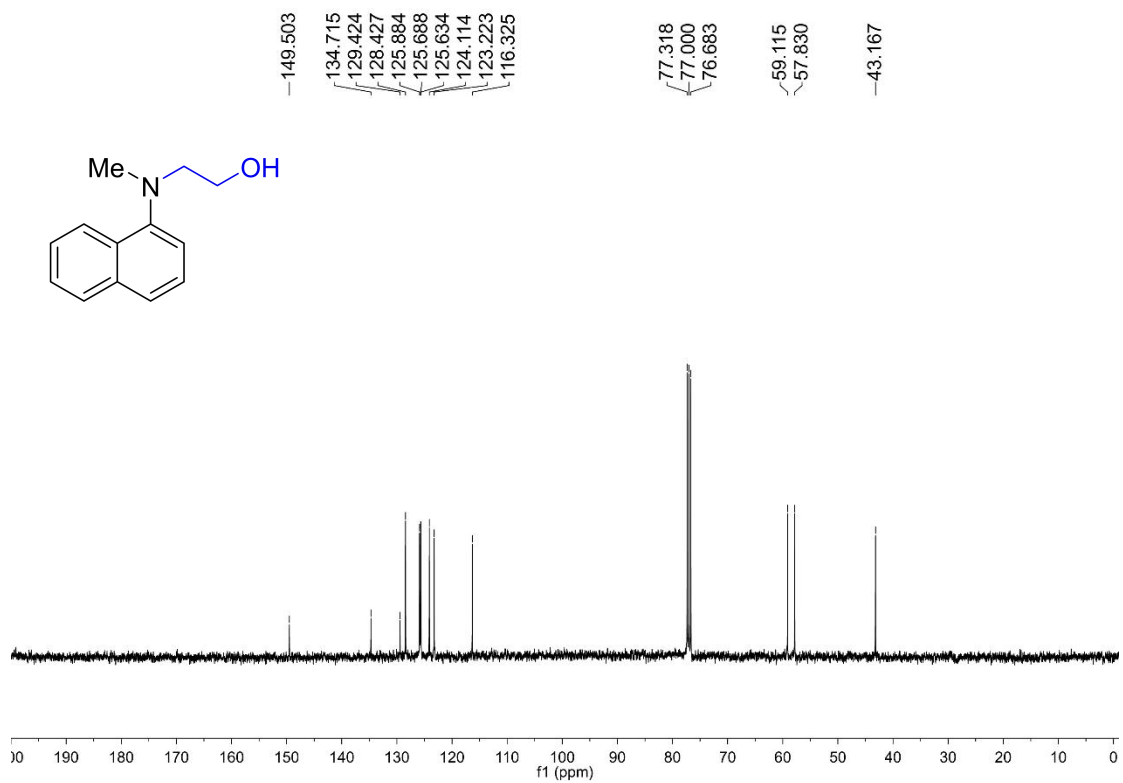

# 2-(indolin-1-yl)ethan-1-ol (3v)

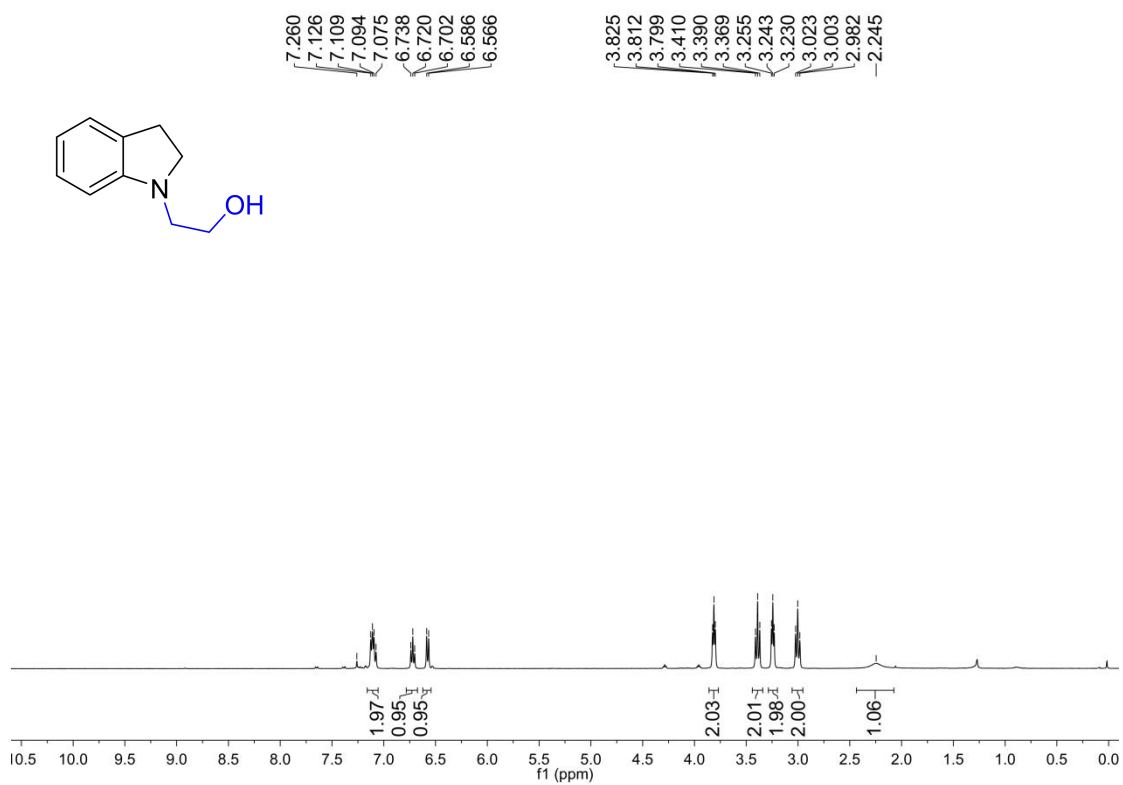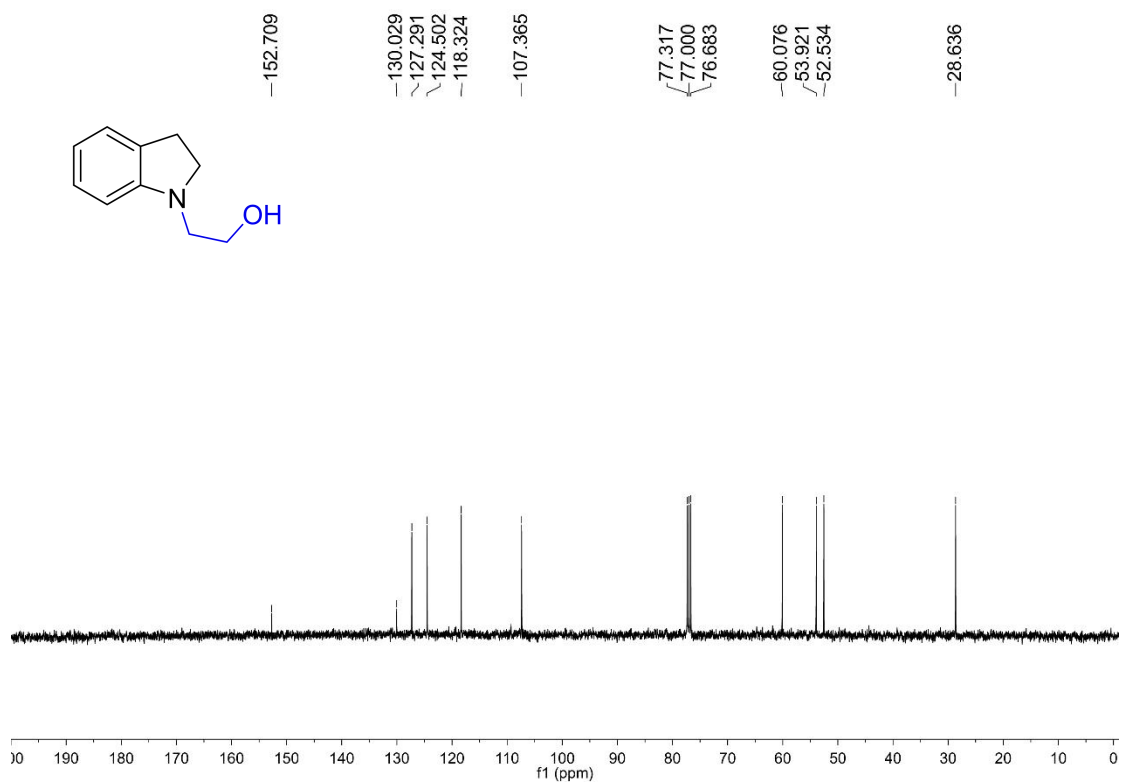

2-(3,4-dihydroquinolin-1(2H)-yl)ethan-1-ol (3w)

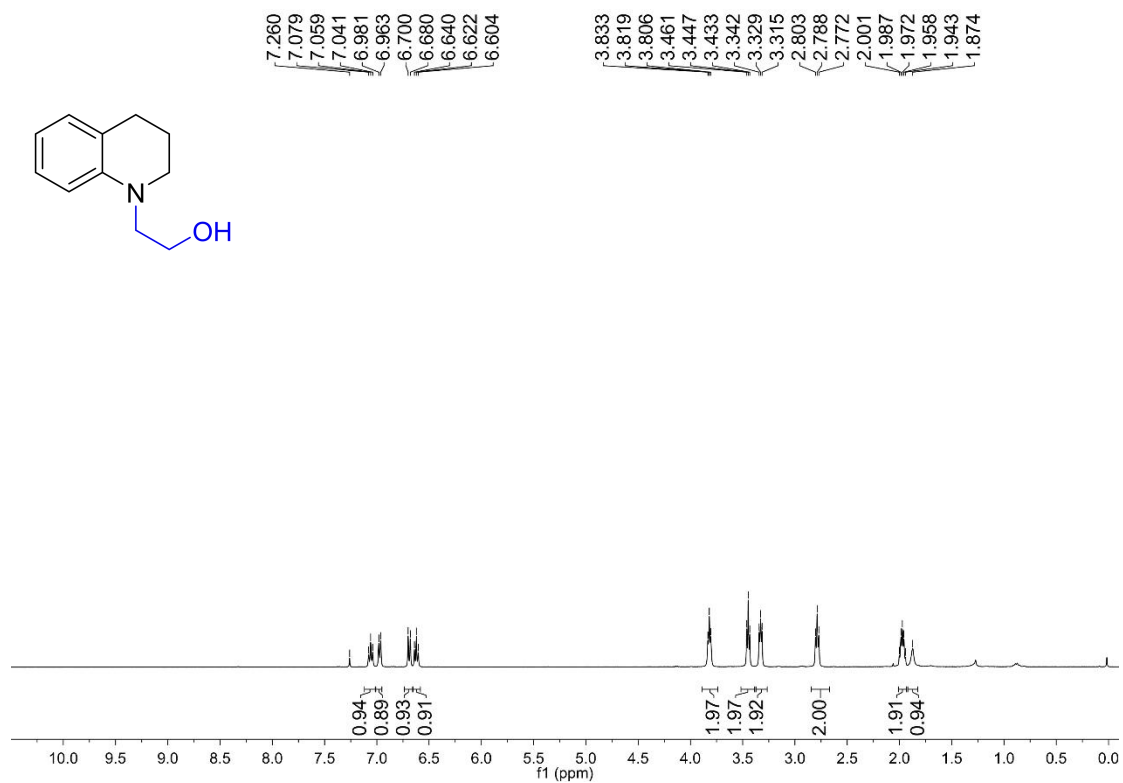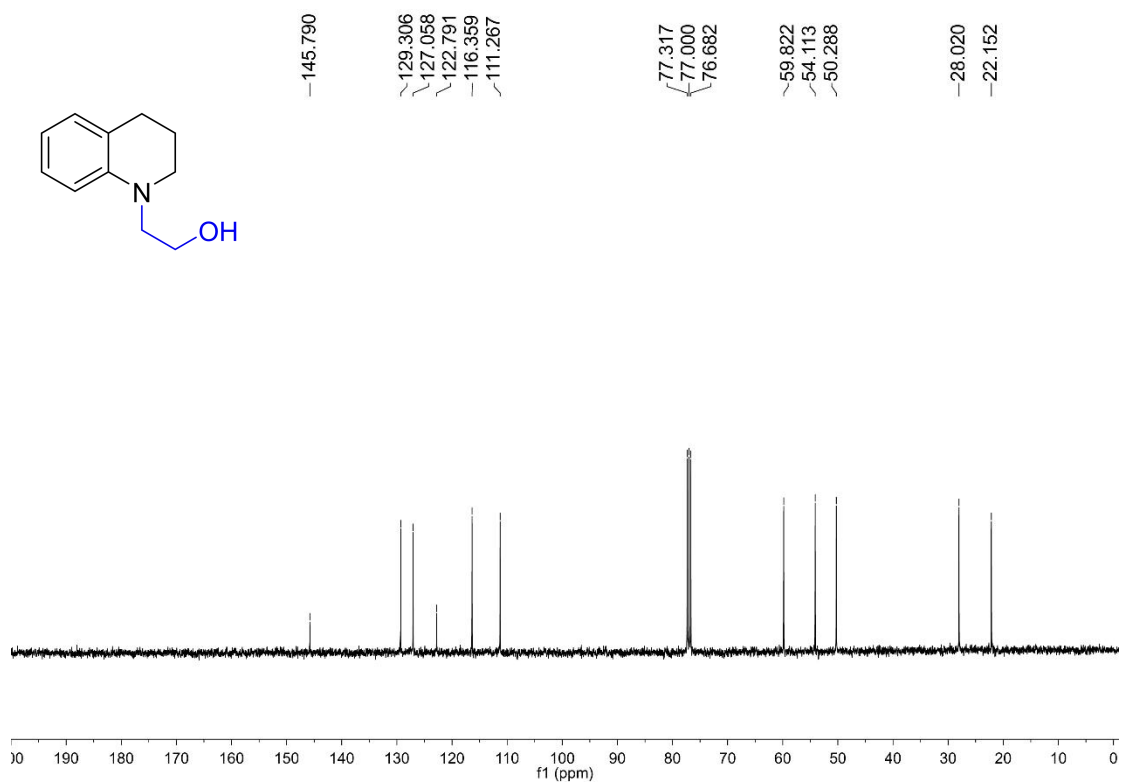



**2-(2,3,4,5-tetrahydro-1H-benzo[b]azepin-1-yl)ethan-1-ol (3x)**

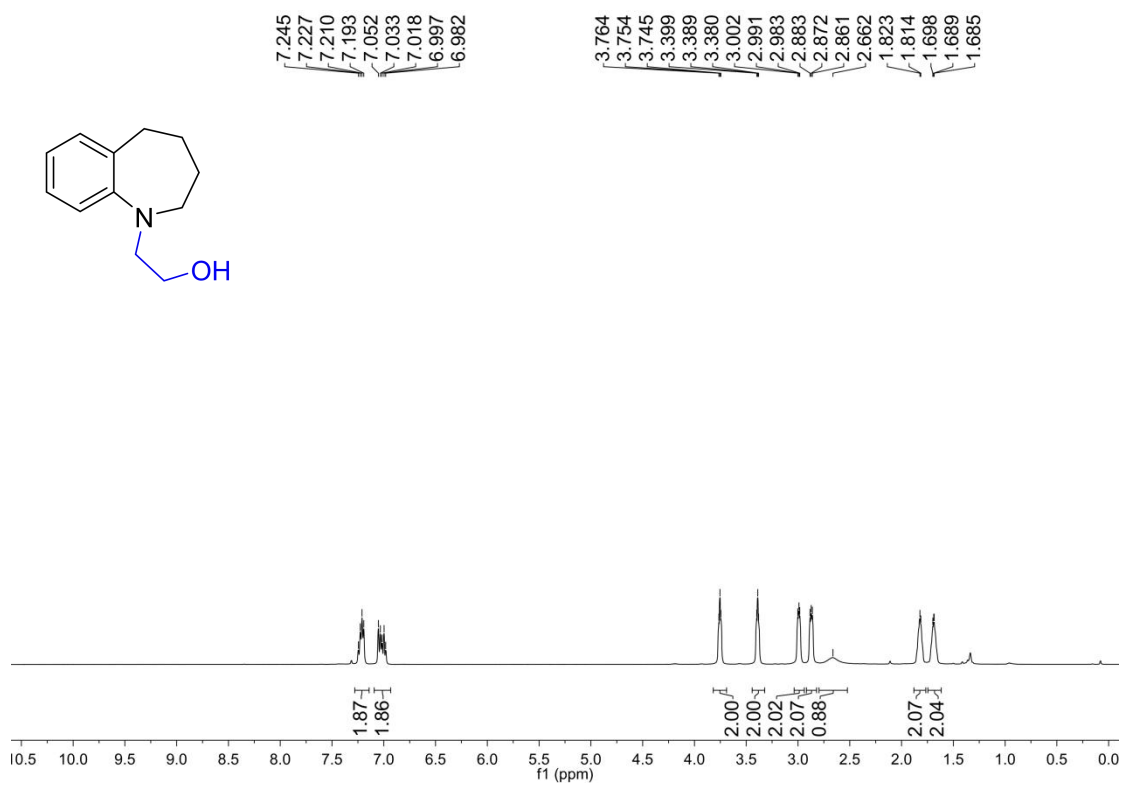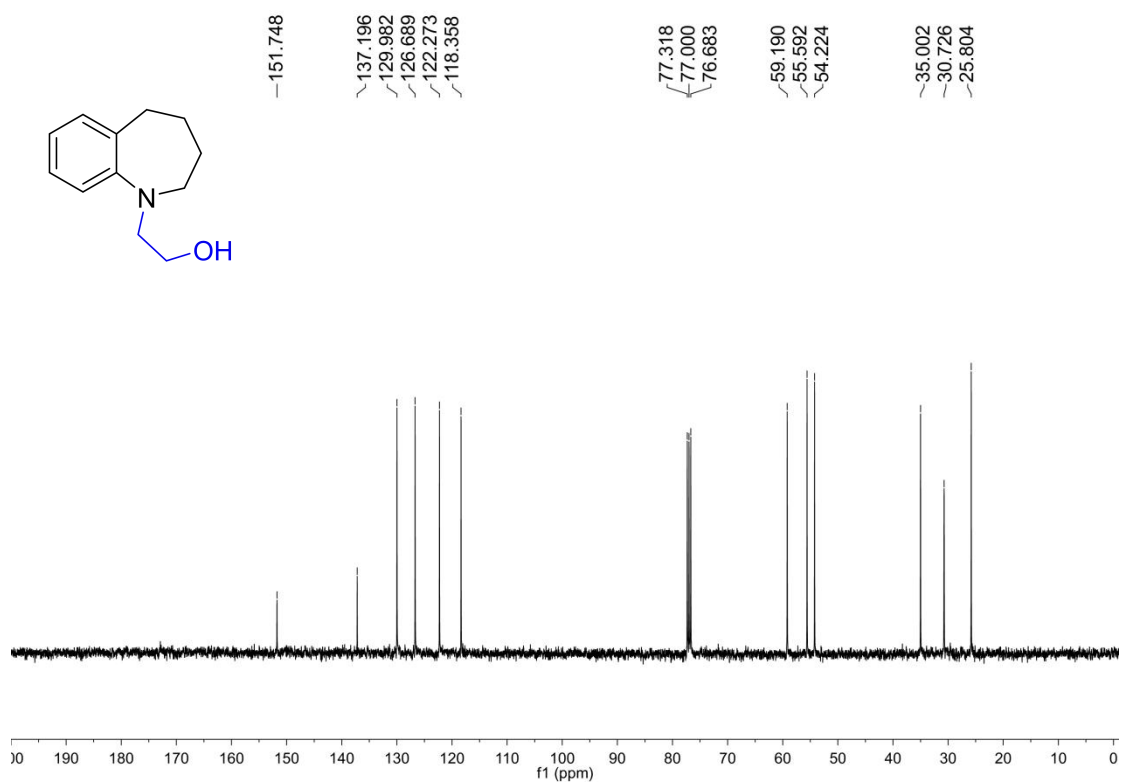

**2-(3,4-dihydroquinolin-1(2H)-yl)ethan-1-ol (3y)**

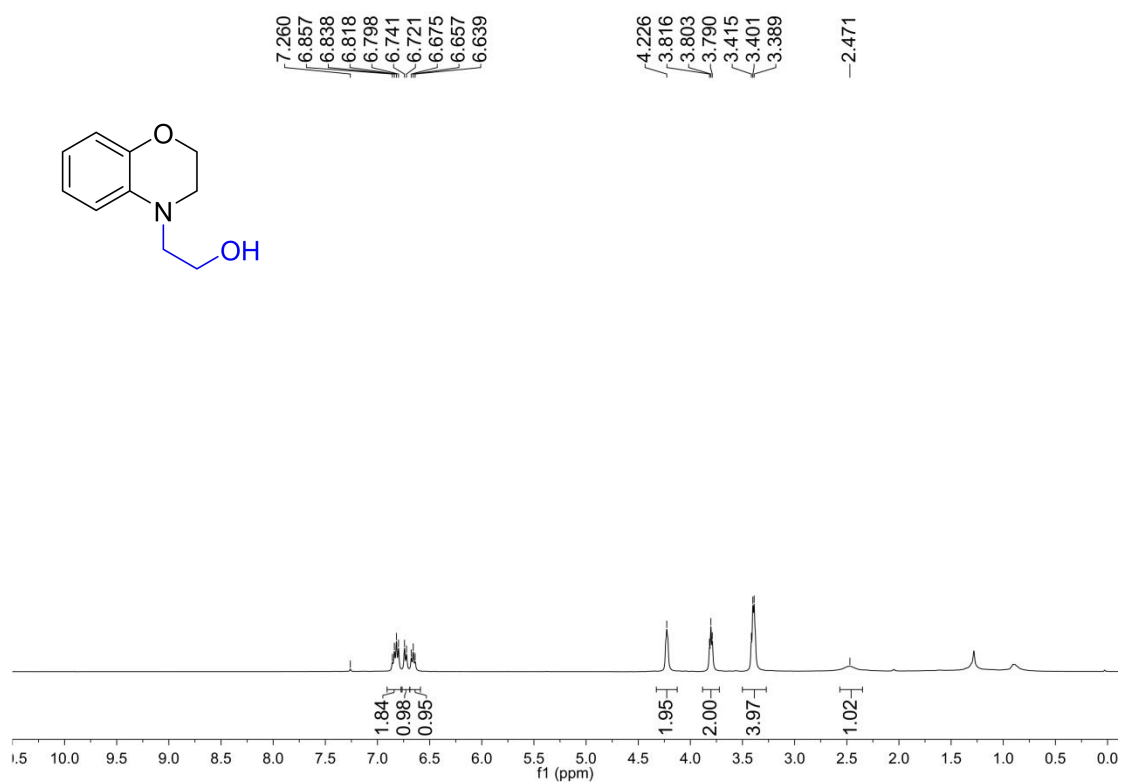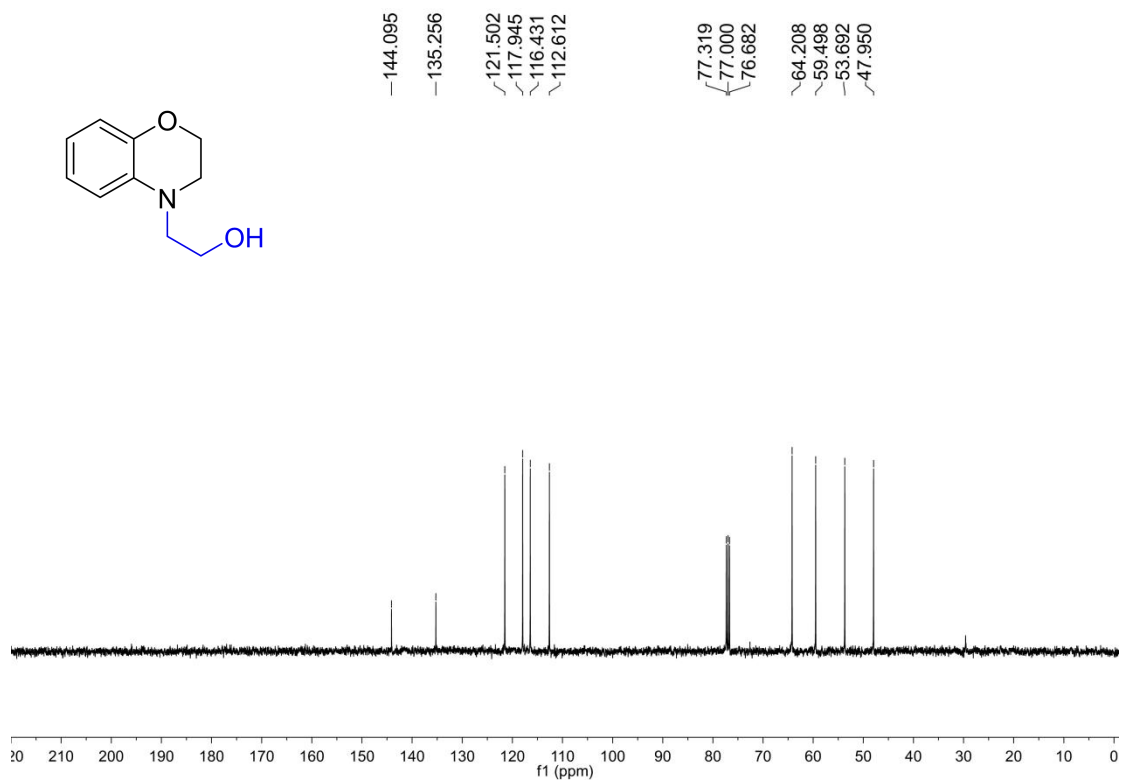

**1-(2-hydroxyethyl)-1,2,3,4-tetrahydro-5H-benzo[b]azepin-5-one (3z)**

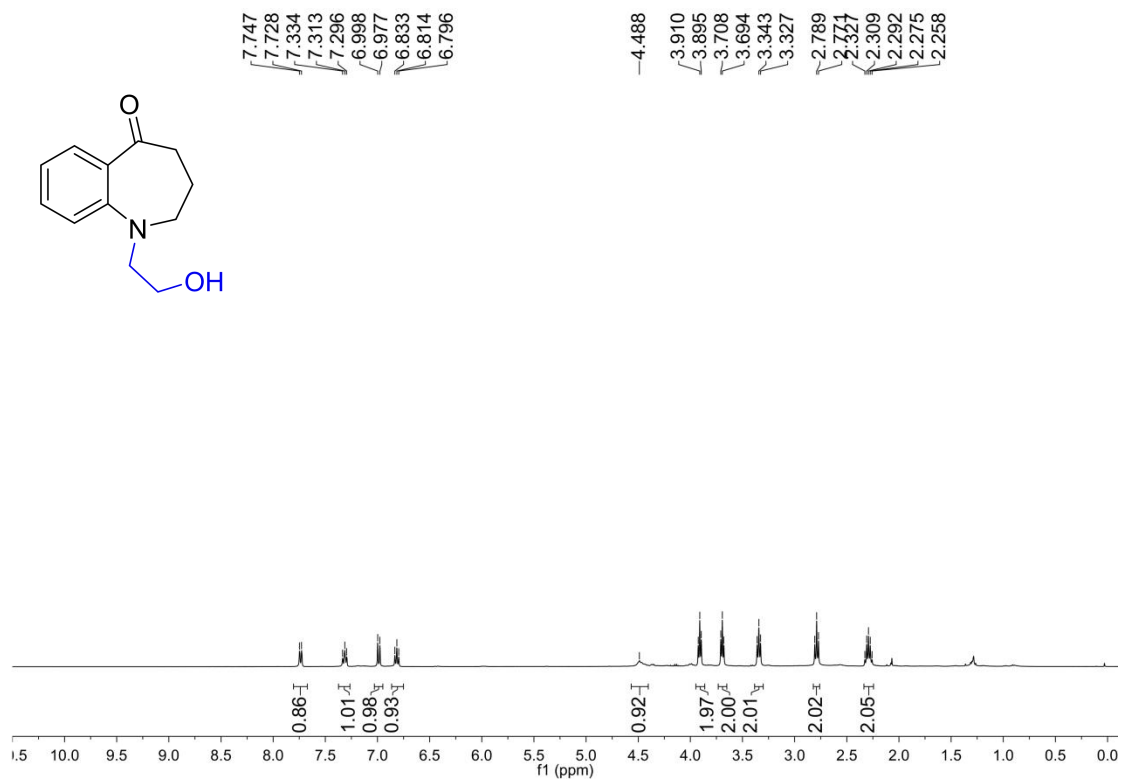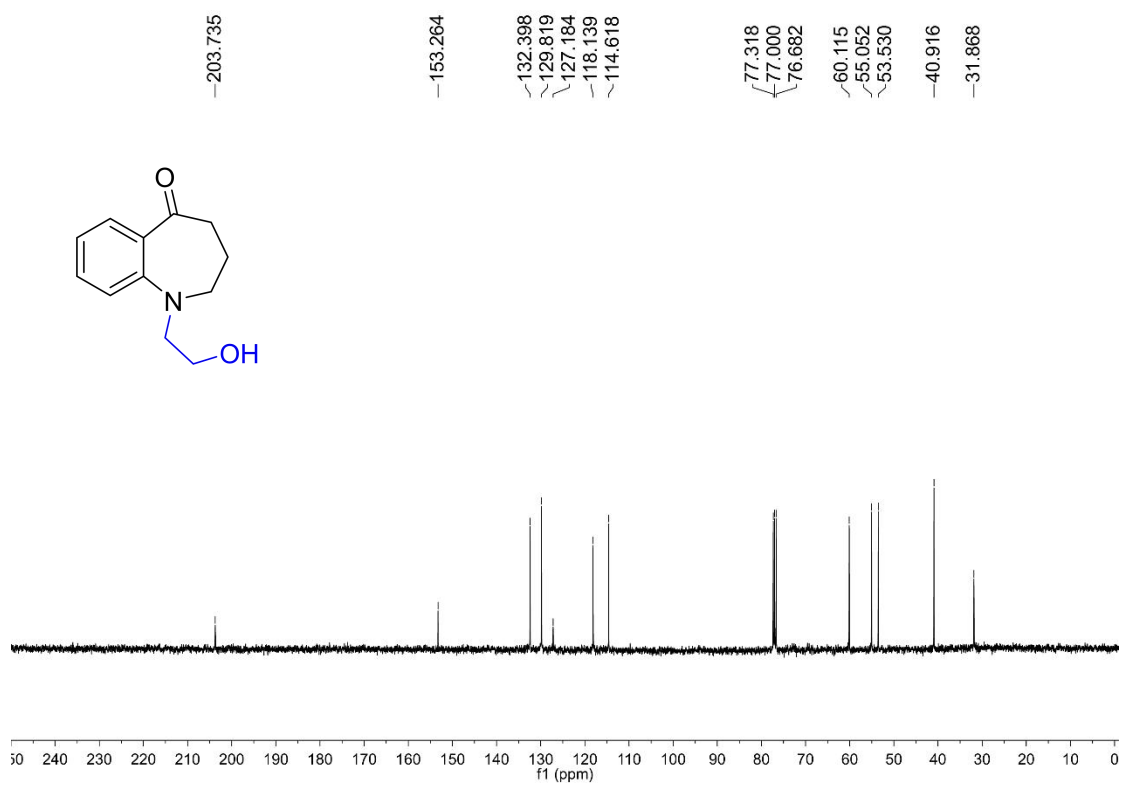

2-(2,3-dihydro-4H-benzo[b][1,4]thiazin-4-yl)ethan-1-ol (3aa)

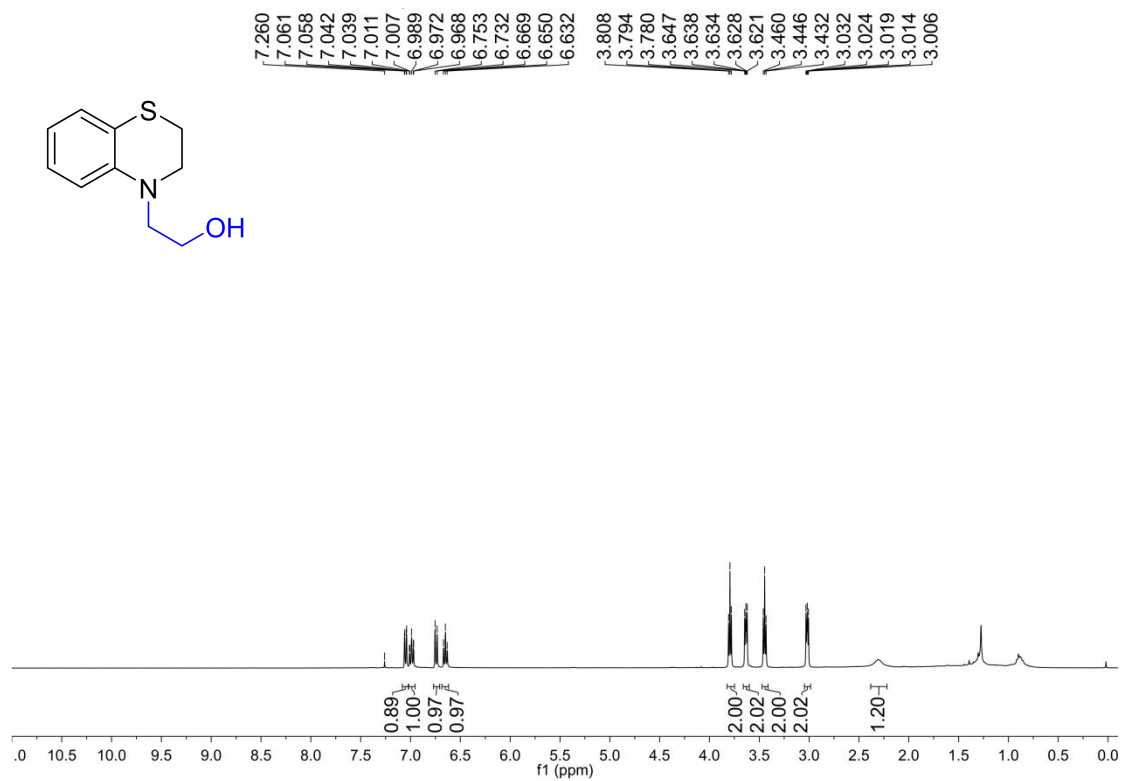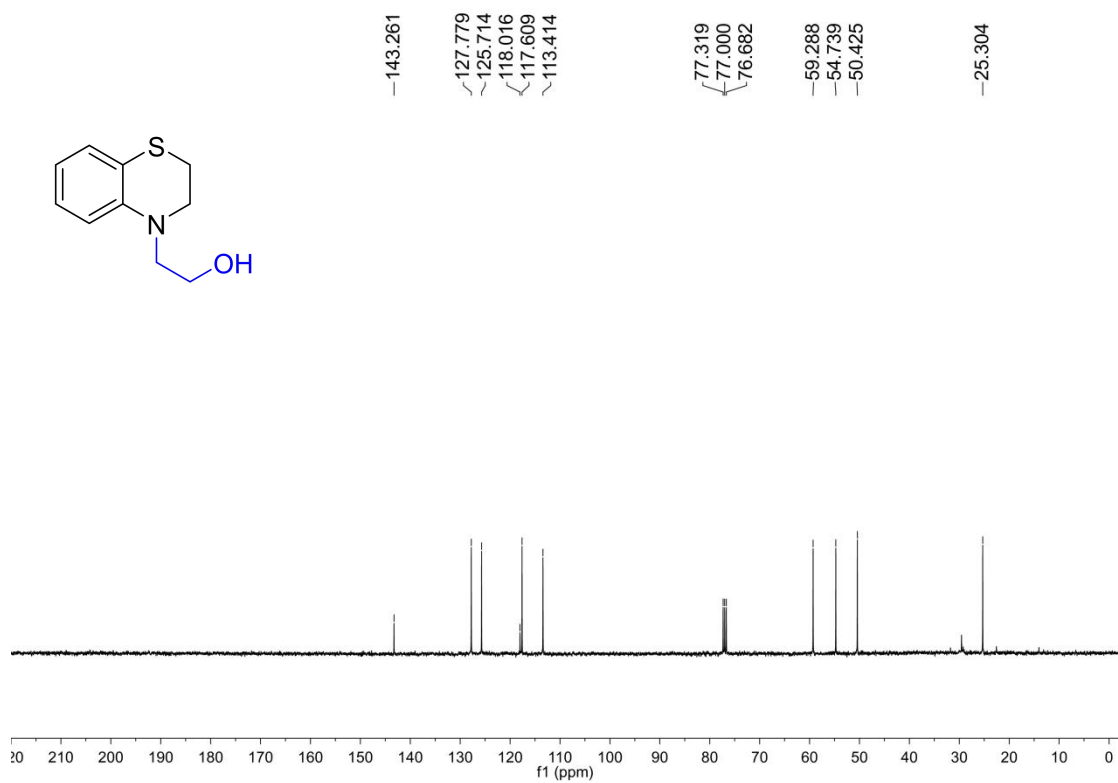

# 4-phenylmorpholin-2-one (3ae)

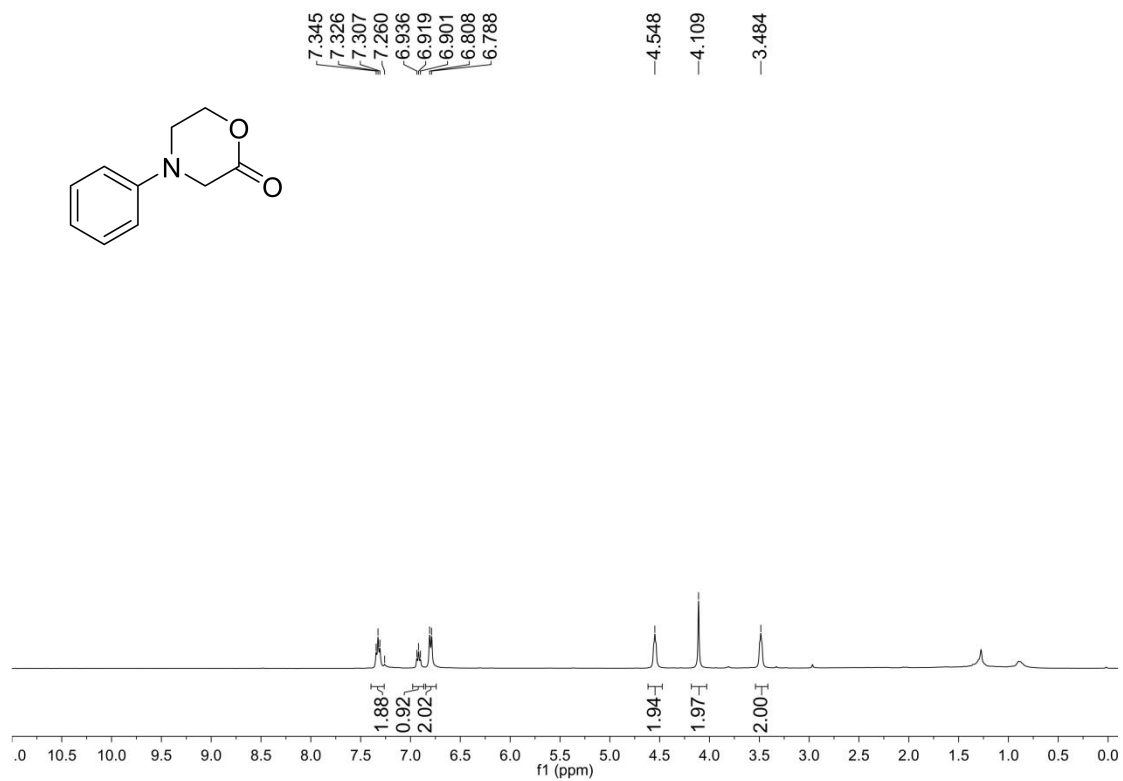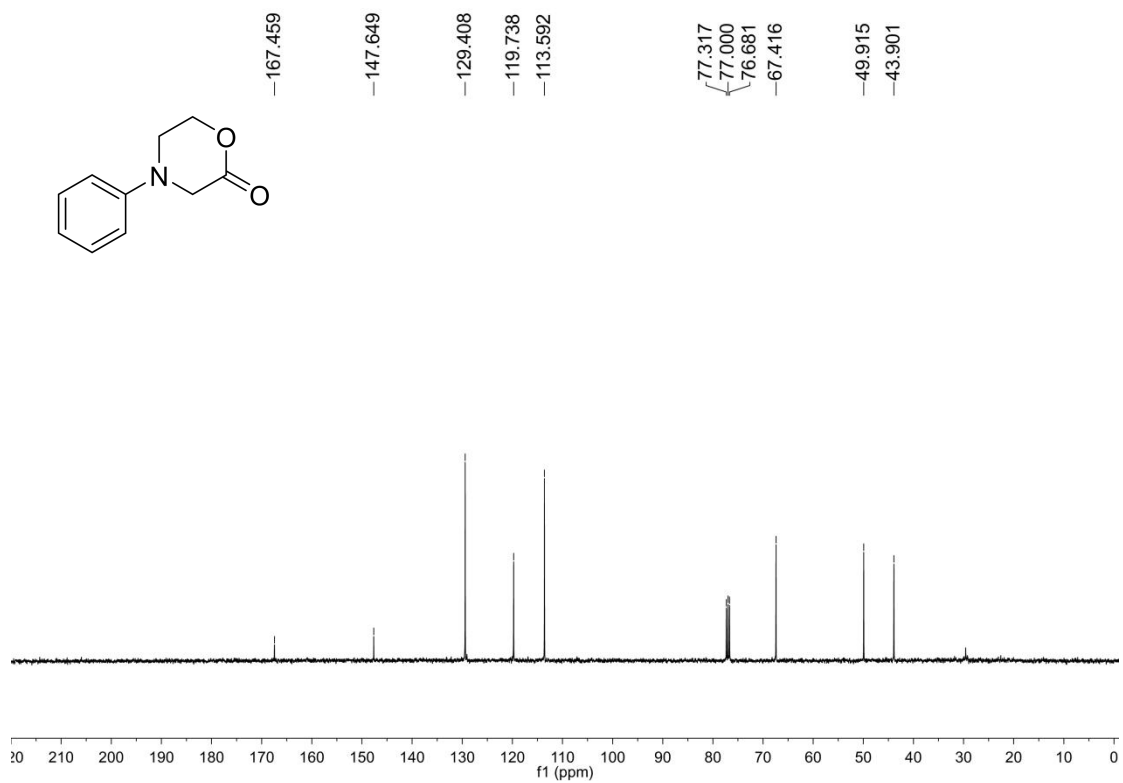

Supplement: c9gc01195a1.pdf [file c9gc01195a1.pdf]
